# Supplementary material for: Effectiveness of self-management interventions in inflammatory arthritis: a systematic review informing the 2021 EULAR recommendations for the implementation of self-management strategies in patients with inflammatory arthritis
Source: PubMed Central journal article supplement (PMC8166594; doi:10.1136/rmdopen-2021-001647), 2021-05-28
Supplement: rmdopen-2021-001647supp001.pdf [file rmdopen-2021-001647supp001.pdf]

## Online supplementary material S1: Search strategies

PubMed: Searched on 20<sup>th</sup> January 2020

| ID | Search Terms                                                                                                                                                                                                                                                                                                                                                                                                                                                                                                                                                                                                                                                                                                                                                                                                                                                                                                                                                                                                                                                                                                                                                                                                                                 | Results   |
|----|----------------------------------------------------------------------------------------------------------------------------------------------------------------------------------------------------------------------------------------------------------------------------------------------------------------------------------------------------------------------------------------------------------------------------------------------------------------------------------------------------------------------------------------------------------------------------------------------------------------------------------------------------------------------------------------------------------------------------------------------------------------------------------------------------------------------------------------------------------------------------------------------------------------------------------------------------------------------------------------------------------------------------------------------------------------------------------------------------------------------------------------------------------------------------------------------------------------------------------------------|-----------|
| #1 | Search (((((((((((rheumat*[Title/Abstract]) OR reumat*[Title/Abstract]) OR arthrit*[Title/Abstract]) OR artrit*[Title/Abstract]) OR "arthritis, rheumatoid"[MeSH Terms]) OR psoriatic*[Title/Abstract]) OR arthritis, psoriatic[MeSH Terms]) OR spondylitis*[Title/Abstract]) OR spondyloarthropat*[Title/Abstract]) OR spondyloarthritis[Title/Abstract]) OR spondylitis, ankylosing[MeSH Terms]                                                                                                                                                                                                                                                                                                                                                                                                                                                                                                                                                                                                                                                                                                                                                                                                                                            | 295,303   |
| #2 | Search (((((((((((((((((((((((self-management[MeSH Terms]) OR self care[MeSH Terms]) OR patient education as topic[MeSH Terms]) OR self-help groups[MeSH Terms]) OR self efficacy[MeSH Terms]) OR behavior therapy[MeSH Terms]) OR counselling[MeSH Terms]) OR manag*[Title/Abstract]) OR monitor[Title/Abstract]) OR patient education[Title/Abstract]) OR helpline[Title/Abstract]) OR written information[Title/Abstract]) OR group-based course[Title/Abstract]) OR support group[Title/Abstract]) OR educat*[Title/Abstract]) OR program*[Title/Abstract]) OR tool*[Title/Abstract]) OR material*[Title/Abstract]) OR training[Title/Abstract]) OR app[Title/Abstract]) OR self-help[Title/Abstract]) OR support[Title/Abstract]) OR peer[Title/Abstract]) OR group*[Title/Abstract]) OR self-efficacy[Title/Abstract]) OR behav*[Title/Abstract]) OR coping[Title/Abstract]) OR skill*[Title/Abstract]) OR adaptive therapy[Title/Abstract]) OR relaxation[Title/Abstract]                                                                                                                                                                                                                                                             | 8,619,378 |
| #3 | Search (((((((((((((((((((((((treatment outcome[MeSH Terms]) OR problem solving[MeSH Terms]) OR asthenia[MeSH Terms]) OR adaptation, psychological[MeSH Terms]) OR efficac*[Title/Abstract]) OR effective*[Title/Abstract]) OR implement*[Title/Abstract]) OR success[Title/Abstract]) OR patient-related outcomes[Title/Abstract]) OR pain[Title/Abstract]) OR functional disability[Title/Abstract]) OR fatigue[Title/Abstract]) OR tired*[Title/Abstract]) OR wear*[Title/Abstract]) OR exhaust*[Title/Abstract]) OR emotional well-being[Title/Abstract]) OR sleep*[Title/Abstract]) OR coping[Title/Abstract]) OR physical well-being[Title/Abstract]) OR asthen*[Title/Abstract]                                                                                                                                                                                                                                                                                                                                                                                                                                                                                                                                                       | 4,533,513 |
| #4 | Search (((((((((((((((((((((((rheumat*[Title/Abstract]) OR reumat*[Title/Abstract]) OR arthrit*[Title/Abstract]) OR artrit*[Title/Abstract]) OR "arthritis, rheumatoid"[MeSH Terms]) OR psoriatic*[Title/Abstract]) OR arthritis, psoriatic[MeSH Terms]) OR spondylitis*[Title/Abstract]) OR spondyloarthropat*[Title/Abstract]) OR spondyloarthritis[Title/Abstract]) OR spondylitis, ankylosing[MeSH Terms])) AND (((((((((((((((((((((((self-management[MeSH Terms]) OR self care[MeSH Terms]) OR patient education as topic[MeSH Terms]) OR self-help groups[MeSH Terms]) OR self efficacy[MeSH Terms]) OR behavior therapy[MeSH Terms]) OR counselling[MeSH Terms]) OR manag*[Title/Abstract]) OR monitor[Title/Abstract]) OR patient education[Title/Abstract]) OR helpline[Title/Abstract]) OR written information[Title/Abstract]) OR group-based course[Title/Abstract]) OR support group[Title/Abstract]) OR educat*[Title/Abstract]) OR program*[Title/Abstract]) OR tool*[Title/Abstract]) OR material*[Title/Abstract]) OR training[Title/Abstract]) OR app[Title/Abstract]) OR self-help[Title/Abstract]) OR support[Title/Abstract]) OR peer[Title/Abstract]) OR group*[Title/Abstract]) OR self-efficacy[Title/Abstract]) OR | 31,845    |



**Embase:** Searched on 24<sup>th</sup> January 2020

| ID | Search Terms                                                                                                                                                                                                                                                                                                                                                                                                                                                                                                                                                                                                                                                                                                                                                                                                                                                                                                                                                                                                                                                                                                                                                                                                                                                                                                                                                                                       | Results   |
|----|----------------------------------------------------------------------------------------------------------------------------------------------------------------------------------------------------------------------------------------------------------------------------------------------------------------------------------------------------------------------------------------------------------------------------------------------------------------------------------------------------------------------------------------------------------------------------------------------------------------------------------------------------------------------------------------------------------------------------------------------------------------------------------------------------------------------------------------------------------------------------------------------------------------------------------------------------------------------------------------------------------------------------------------------------------------------------------------------------------------------------------------------------------------------------------------------------------------------------------------------------------------------------------------------------------------------------------------------------------------------------------------------------|-----------|
| #1 | ((('rheumat*':ab,ti OR 'reumat*':ab,ti OR 'arthrit*':ab,ti OR 'artrit*':ab,ti OR 'psoriatic*':ab,ti OR 'spondylitis*':ab,ti OR 'spondyloarthropat*':ab,ti OR 'spondyloarthritis':ab,ti) AND 'rheumatoid arthritis'/exp AND 'psoriatic arthritis'/exp AND 'ankylosing spondylitis'/exp AND 'manag*':ab,ti OR 'monitor':ab,ti OR 'patient education':ab,ti OR 'helpline':ab,ti OR 'written information':ab,ti OR 'group-based course':ab,ti OR 'support group':ab,ti OR 'educat*':ab,ti OR 'program*':ab,ti OR 'tool*':ab,ti OR 'material*':ab,ti OR 'training':ab,ti OR 'app':ab,ti OR 'self-help':ab,ti OR 'support':ab,ti OR 'peer':ab,ti OR 'group*':ab,ti OR 'self-efficacy':ab,ti OR 'behav*':ab,ti OR 'coping':ab,ti OR 'skill*':ab,ti OR 'adaptive therapy':ab,ti OR 'relaxation':ab,ti) AND 'self care'/exp AND 'patient education'/exp AND 'self help'/exp AND 'self concept'/exp AND 'behavior therapy'/exp AND 'counseling'/exp AND 'efficac*':ab,ti OR 'effective*':ab,ti OR 'implement*':ab,ti OR 'success':ab,ti OR 'patient-related outcomes':ab,ti OR 'pain':ab,ti OR 'functional disability':ab,ti OR 'fatigue':ab,ti OR 'tired*':ab,ti OR 'wear*':ab,ti OR 'exhaust*':ab,ti OR 'emotional well-being':ab,ti OR 'sleep*':ab,ti OR 'coping':ab,ti OR 'physical well-being':ab,ti OR 'asthen*':ab,ti) AND 'treatment outcome'/exp AND 'problem solving'/exp OR 'coping behavior'/exp | 63,245    |
| #2 | 'crossover procedure':de OR 'double-blind procedure':de OR 'randomized controlled trial':de OR 'single-blind procedure':de OR random*:de,ab,ti OR factorial*:de,ab,ti OR crossover*:de,ab,ti OR ((cross NEXT/1 over*):de,ab,ti) OR placebo*:de,ab,ti OR ((doubl* NEAR/1 blind*):de,ab,ti) OR ((singl* NEAR/1 blind*):de,ab,ti) OR assign*:de,ab,ti OR allocat*:de,ab,ti OR volunteer*:de,ab,ti                                                                                                                                                                                                                                                                                                                                                                                                                                                                                                                                                                                                                                                                                                                                                                                                                                                                                                                                                                                                     | 2,549,613 |
| #3 | 'systematic review'/syn OR 'meta analysis'/syn                                                                                                                                                                                                                                                                                                                                                                                                                                                                                                                                                                                                                                                                                                                                                                                                                                                                                                                                                                                                                                                                                                                                                                                                                                                                                                                                                     | 432,662   |
| #4 | #1 AND #2 AND #3                                                                                                                                                                                                                                                                                                                                                                                                                                                                                                                                                                                                                                                                                                                                                                                                                                                                                                                                                                                                                                                                                                                                                                                                                                                                                                                                                                                   | 718       |

**Cochrane Library:** Searched on 20<sup>th</sup> January 2020

| ID | Search Terms                                                                                                                                                                                                                                    | Results |
|----|-------------------------------------------------------------------------------------------------------------------------------------------------------------------------------------------------------------------------------------------------|---------|
| #1 | (rheumat* OR reumat* OR arthrit* OR artrit* OR psoriatic* OR spondylitis* OR spondyloarthropat* OR spondyloarthritis):ti,ab,kw in Cochrane Reviews, Trials                                                                                      | 28,562  |
| #2 | MeSH descriptor: [Arthritis, Rheumatoid] explode all trees                                                                                                                                                                                      | 5,573   |
| #3 | MeSH descriptor: [Arthritis, Psoriatic] explode all trees                                                                                                                                                                                       | 364     |
| #4 | MeSH descriptor: [Spondylitis, Ankylosing] explode all trees                                                                                                                                                                                    | 617     |
| #5 | #1 AND #2 OR #3 OR #4 in Cochrane Reviews, Trials                                                                                                                                                                                               | 6,195   |
| #6 | (manag* OR monitor OR patient education OR helpline OR written information OR group-based course OR support group OR educat* OR program* OR tool* OR material* OR training OR app OR self-help OR support OR peer OR group* OR self-efficacy OR | 916,217 |

|     |                                                                                                                                                                                                                                                                             |         |
|-----|-----------------------------------------------------------------------------------------------------------------------------------------------------------------------------------------------------------------------------------------------------------------------------|---------|
|     | behav* OR coping OR skill* OR adaptive therapy OR relaxation):ti,ab,kw in Cochrane Reviews, Trials                                                                                                                                                                          |         |
| #7  | MeSH descriptor: [Self-Management] explode all trees                                                                                                                                                                                                                        | 263     |
| #8  | MeSH descriptor: [Self Care] explode all trees                                                                                                                                                                                                                              | 5,418   |
| #9  | MeSH descriptor: [Patient Education as Topic] explode all trees                                                                                                                                                                                                             | 8,521   |
| #10 | MeSH descriptor: [Self-Help Groups] explode all trees                                                                                                                                                                                                                       | 755     |
| #11 | MeSH descriptor: [Self Efficacy] explode all trees                                                                                                                                                                                                                          | 2,933   |
| #12 | MeSH descriptor: [Behavior Therapy] explode all trees                                                                                                                                                                                                                       | 15,643  |
| #13 | MeSH descriptor: [Counseling] explode all trees                                                                                                                                                                                                                             | 5,121   |
| #14 | #6 AND #7 OR #8 OR #9 OR #10 OR #11 OR #12 OR #13 in Cochrane Reviews, Trials                                                                                                                                                                                               | 32,645  |
| #15 | (efficac* OR effective* OR implement* OR success OR patient-related outcomes OR pain OR functional disability OR fatigue OR tired* OR wear* OR exhaust* OR emotional well-being OR sleep* OR coping OR physical well-being OR asthen*):ti,ab,kw in Cochrane Reviews, Trials | 688,974 |
| #16 | MeSH descriptor: [Treatment Outcome] explode all trees                                                                                                                                                                                                                      | 133,928 |
| #17 | MeSH descriptor: [Problem Solving] explode all trees                                                                                                                                                                                                                        | 1,510   |
| #18 | MeSH descriptor: [Asthenia] explode all trees                                                                                                                                                                                                                               | 74      |
| #19 | MeSH descriptor: [Adaptation, Psychological] explode all trees                                                                                                                                                                                                              | 5,209   |
| #20 | #15 AND #16 OR #17 OR #18 OR #19 in Cochrane Reviews, Trials                                                                                                                                                                                                                | 89,928  |
| #21 | #5 AND #14 AND #20 in Cochrane Reviews, Trials                                                                                                                                                                                                                              | 72      |

**CINAHL Complete:** Searched on 23<sup>rd</sup> January 2020

| ID | Search Terms                                                                                                                                                                                                                                                                                                                                                                                                                         | Results |
|----|--------------------------------------------------------------------------------------------------------------------------------------------------------------------------------------------------------------------------------------------------------------------------------------------------------------------------------------------------------------------------------------------------------------------------------------|---------|
| S1 | AB MH Randomized controlled trials OR MH double-blind studies OR MH single-blind studies OR MH random assignment OR MH pretest-posttest design OR MH cluster sample OR TI (comparative or comparison) AND AB (randomly) OR TI (randomized or randomised) NOT MH (rats)                                                                                                                                                               | 233,593 |
| S2 | ( TI ( rheumat* OR reumat* OR arthrit* OR artrit* OR psoriatic* OR spondylitis* OR spondyloarthropat* OR spondyloarthritis OR (MH "arthritis, rheumatoid") OR (MH "arthritis, psoriatic") OR (MH "spondylitis, ankylosing") ) AND TI ( manag* OR monitor OR patient education OR helpline OR written information OR group-based course OR support group OR educat* OR program* OR tool* OR material* OR training OR app OR self-help | 8,540   |

|    |                                                                                                                                                                                                                                                                                                                                                                                                                                                                                                                                                                                                                                                                                                                                                                                                                                                                                                                                                                                                                                                                                                                                                                                                                                                                                                                                                                                                                                                                                                                                                                                                                                                                                                                                                                                         |         |
|----|-----------------------------------------------------------------------------------------------------------------------------------------------------------------------------------------------------------------------------------------------------------------------------------------------------------------------------------------------------------------------------------------------------------------------------------------------------------------------------------------------------------------------------------------------------------------------------------------------------------------------------------------------------------------------------------------------------------------------------------------------------------------------------------------------------------------------------------------------------------------------------------------------------------------------------------------------------------------------------------------------------------------------------------------------------------------------------------------------------------------------------------------------------------------------------------------------------------------------------------------------------------------------------------------------------------------------------------------------------------------------------------------------------------------------------------------------------------------------------------------------------------------------------------------------------------------------------------------------------------------------------------------------------------------------------------------------------------------------------------------------------------------------------------------|---------|
|    | OR support OR peer OR group* OR self-efficacy OR behav* OR coping OR skill* OR adaptive therapy OR relaxation OR (MH "self-management") OR (MH "self care") OR (MH "patient education as topic") OR (MH "self-help groups") OR (MH "self efficacy") OR (MH "behavior therapy") OR (MH "counselling") ) AND TI ( efficac* OR effective* OR implement* OR success OR patient-related outcomes OR pain OR functional disability OR fatigue OR tired* OR wear* OR exhaust* OR emotional well-being OR sleep* OR coping OR physical well-being OR asthen* OR (MH "treatment outcome") OR (MH "problem solving") OR (MH "asthenia") OR (MH "adaptation, psychological") ) ) OR ( AB ( rheumat* OR reumat* OR arthrit* OR artrit* OR psoriatic* OR spondylitis* OR spondyloarthropat* OR spondyloarthritis OR (MH "arthritis, rheumatoid") OR (MH "arthritis, psoriatic") OR (MH "spondylitis, ankylosing") ) ) AND AB ( manag* OR monitor OR patient education OR helpline OR written information OR group-based course OR support group OR educat* OR program* OR tool* OR material* OR training OR app OR self-help OR support OR peer OR group* OR self-efficacy OR behav* OR coping OR skill* OR adaptive therapy OR relaxation OR (MH "self-management") OR (MH "self care") OR (MH "patient education as topic") OR (MH "self-help groups") OR (MH "self efficacy") OR (MH "behavior therapy") OR (MH "counselling") ) ) AND AB ( efficac* OR effective* OR implement* OR success OR patient-related outcomes OR pain OR functional disability OR fatigue OR tired* OR wear* OR exhaust* OR emotional well-being OR sleep* OR coping OR physical well-being OR asthen* OR (MH "treatment outcome") OR (MH "problem solving") OR (MH "asthenia") OR (MH "adaptation, psychological") ) ) |         |
| S3 | Meta analysis/ OR Meta analys\$.tw. OR Metaanaly\$.tw. OR exp Literature review/ OR (systematic adj (review or overview)).tw. NOT Commentary.pt. OR Letter.pt. OR Editorial.pt. OR Animals/                                                                                                                                                                                                                                                                                                                                                                                                                                                                                                                                                                                                                                                                                                                                                                                                                                                                                                                                                                                                                                                                                                                                                                                                                                                                                                                                                                                                                                                                                                                                                                                             | 283,919 |
| S4 | (S1 AND S2) AND S3)                                                                                                                                                                                                                                                                                                                                                                                                                                                                                                                                                                                                                                                                                                                                                                                                                                                                                                                                                                                                                                                                                                                                                                                                                                                                                                                                                                                                                                                                                                                                                                                                                                                                                                                                                                     | 67      |

**PEDro:** Searched on 23<sup>rd</sup> January 2020

| Search Terms                                                 | Results |
|--------------------------------------------------------------|---------|
| Abstract & Title: self-management AND inflammatory arthritis | 5       |
