# Supplementary material for: Effectiveness of self-management interventions in inflammatory arthritis: a systematic review informing the 2021 EULAR recommendations for the implementation of self-management strategies in patients with inflammatory arthritis
Source: PubMed Central journal article supplement (PMC8166594; doi:10.1136/rmdopen-2021-001647), 2021-05-28
Supplement: rmdopen-2021-001647supp002.pdf [file rmdopen-2021-001647supp002.pdf]

## Online supplementary material S2: Excluded articles

| Reference                                                                                                                                                                                                                                                                                                                     | Participants | Interventions | Outcomes | Type of study |
|-------------------------------------------------------------------------------------------------------------------------------------------------------------------------------------------------------------------------------------------------------------------------------------------------------------------------------|--------------|---------------|----------|---------------|
| Bal MI, Sattoe JNT, Roelofs PDDM, Bal R, van Staa A, Miedema HS. Exploring effectiveness and effective components of self-management interventions for young people with chronic physical conditions: A systematic review. <i>Patient Education and Counseling</i> . 2016;99:1293-309.                                        | NO           | YES           | YES      | YES           |
| Banerjee A, Hendrick P, Bhattacharjee P, Blake H. A systematic review of outcome measures utilised to assess self-management in clinical trials in patients with chronic pain. <i>Patient Education and Counseling</i> . 2018;101:767-78.                                                                                     | DOUBT        | DOUBT         | NO       | YES           |
| Chaleshgar Kordasiabi M, Akhlaghi M, Baghianimoghadam MH, Morowatisharifabad MA, Askarishahi M, Enjezab B, et al. Self Management Behaviors in Rheumatoid Arthritis Patients and Associated Factors in Tehran 2013. <i>Global journal of health science</i> . 2015;8:156-67.                                                  | YES          | NO            | NO       | NO            |
| de Thurah A, Stengaard-Pedersen K, Axelsen M, Fredberg U, Schougaard LMV, Hjollund NHI, et al. Tele-Health Followup Strategy for Tight Control of Disease Activity in Rheumatoid Arthritis: Results of a Randomized Controlled Trial. <i>Arthritis Care Res (Hoboken)</i> . 2018;70:353-60.                                   | YES          | NO            | YES      | YES           |
| Eisele A, Schagg D, Krämer LV, Bengel J, Göhner W. Behaviour change techniques applied in interventions to enhance physical activity adherence in patients with chronic musculoskeletal conditions: A systematic review and meta-analysis. <i>Patient Education and Counseling</i> . 2019;102:25-36.                          | NO           | YES           | YES      | YES           |
| Ferwerda M, van Beugen S, van Middendorp H, Visser H, Vonkeman H, Creemers M, et al. Tailored, Therapist-Guided Internet-Based Cognitive Behavioral Therapy Compared to Care as Usual for Patients With Rheumatoid Arthritis: Economic Evaluation of a Randomized Controlled Trial. <i>J Med Internet Res</i> . 2018;20:e260. | YES          | YES           | NO       | YES           |

|                                                                                                                                                                                                                                                                                             |       |       |       |     |
|---------------------------------------------------------------------------------------------------------------------------------------------------------------------------------------------------------------------------------------------------------------------------------------------|-------|-------|-------|-----|
| Karimipour H, Sayadi N, Shariati A, Haghghi MH, Yaghoobi R. The Effects of a Self-Care Program on Promoting Self-Care Behaviors in Patients with Psoriasis. <i>Jundishapur J Chronic Dis Care.</i> 2017;6:e17378.                                                                           | NO    | YES   | YES   | YES |
| Keefe FJ, Lefebvre JC, Kerns RD, Rosenberg R, Beupre P, Prochaska J, et al. Understanding the adoption of arthritis self-management: stages of change profiles among arthritis patients. <i>Pain.</i> 2000;87:303-13.                                                                       | DOUBT | DOUBT | DOUBT | NO  |
| Keogh A, Tully MA, Matthews J, Hurley DA. A review of behaviour change theories and techniques used in group based self-management programmes for chronic low back pain and arthritis. <i>Manual Therapy.</i> 2015;20:727-35.                                                               | NO    | DOUBT | DOUBT | YES |
| Lambert S, Beatty L, McElduff P, Levesque J, Lawsin C, Turner J, et al. Are self-administered psychosocial interventions as efficacious as guided interventions in the management of chronic health conditions? <i>Asia-Pacific Journal of Clinical Oncology.</i> 2015;11:151.              | NO    | YES   | YES   | YES |
| Lambert S, Beatty L, McElduff P, Levesque J, Lawsin C, Turner J, et al. Evaluations of written self-administered psychosocial interventions to improve psychosocial and physical outcomes among adults with chronic health conditions: A meta-analysis. <i>Psycho-Oncology.</i> 2015;24:73. | NO    | YES   | YES   | YES |
| Lambert SD, Beatty L, McElduff P, Levesque JV, Lawsin C, Jacobsen P, et al. A systematic review and meta-analysis of written self-administered psychosocial interventions among adults with a physical illness. <i>Patient Education and Counseling.</i> 2017;100:2200-17.                  | NO    | YES   | YES   | YES |
| Larsen MH, Hagen KB, Krogstad AL, Aas E, Wahl AK. Limited evidence of the effects of patient education and self-management interventions in psoriasis patients: A systematic review. <i>Patient Education and Counseling.</i> 2014;94:158-69.                                               | NO    | YES   | YES   | YES |
| Lorig K, Ritter PL, Plant K. A disease-specific self-help program compared with a generalized chronic disease self-help program for arthritis patients. <i>Arthritis Rheum.</i> 2005;53:950-7.                                                                                              | NO    | YES   | YES   | YES |

|                                                                                                                                                                                                                                                                                                |     |       |       |       |
|------------------------------------------------------------------------------------------------------------------------------------------------------------------------------------------------------------------------------------------------------------------------------------------------|-----|-------|-------|-------|
| Lorig KR, Ritter PL, Laurent DD, Plant K. The internet-based arthritis self-management program: a one-year randomized trial for patients with arthritis or fibromyalgia. <i>Arthritis Rheum.</i> 2008;59:1009-17.                                                                              | NO  | YES   | YES   | YES   |
| Manning VL, Kaambwa B, Ratcliffe J, Scott DL, Choy E, Hurley MV, et al. Economic evaluation of a brief education, self-management and upper limb exercise training in people with rheumatoid arthritis (EXTRA) programme: a trial-based analysis. <i>Rheumatology (Oxford).</i> 2015;54:302-9. | YES | YES   | NO    | YES   |
| Rasmussen GS, Kragballe K, Maindal HT, Lomborg K. Experience of Being Young With Psoriasis: Self-Management Support Needs. <i>Qualitative Health Research.</i> 2017;28:73-86.                                                                                                                  | NO  | DOUBT | DOUBT | DOUBT |
| Rasmussen GS, Maindal HT, Lomborg K. Self-management in daily life with psoriasis: an integrative review of patient needs for structured education. <i>Nursing research and practice.</i> 2012;2012:890860-.                                                                                   | NO  | DOUBT | DOUBT | DOUBT |
| Rees S, Williams A. Promoting and supporting self-management for adults living in the community with physical chronic illness: A systematic review of the effectiveness and meaningfulness of the patient-practitioner encounter. <i>JBI Libr Syst Rev.</i> 2009;7:492-582.                    | NO  | DOUBT | DOUBT | YES   |
| Rhee SH, Parker JC, Smarr KL, Petroski GF, Johnson JC, Hewett JE, et al. Stress management in rheumatoid arthritis: what is the underlying mechanism? <i>Arthritis Care Res.</i> 2000;13:435-42.                                                                                               | YES | YES   | NO    | NO    |
| Shigaki CL, Smarr KL, Gong Y, Donovan-Hanson K, Siva C, Johnson RA, et al. Social interactions in an online self-management program for rheumatoid arthritis. <i>Chronic Illn.</i> 2008;4:239-46.                                                                                              | YES | YES   | DOUBT | NO    |
| Solomon DH, Warsi A, Brown-Stevenson T, Farrell M, Gauthier S, Mikels D, et al. Does self-management education benefit all populations with arthritis? A randomized controlled trial in a primary care physician network. <i>J Rheumatol.</i> 2002;29:362-8.                                   | NO  | YES   | YES   | YES   |

|                                                                                                                                                                                                                                                                |     |     |     |    |
|----------------------------------------------------------------------------------------------------------------------------------------------------------------------------------------------------------------------------------------------------------------|-----|-----|-----|----|
| Spencer S, Martindale JH, MacPhie E, Montgomery P. Self management programme for ankylosing spondylitis. Cochrane Database of Systematic Reviews. 2015.                                                                                                        | YES | YES | YES | NO |
| Vermaak V, Briffa NK, Langlands B, Inderjeeth C, McQuade J. Evaluation of a disease specific rheumatoid arthritis self-management education program, a single group repeated measures study. BMC Musculoskeletal Disorders. 2015;16:214.                       | YES | YES | YES | NO |
| Niedermann K, de Bie RA, Kubli R, Ciurea A, Steurer-Stey C, Villiger PM, et al. Effectiveness of individual resource-oriented joint protection education in people with rheumatoid arthritis. A randomized controlled trial. Patient Educ Couns. 2011;82:42-8. | YES | YES | YES | NO |

Yes: the study meets the inclusion criteria; No: the study does not meet the inclusion criteria; Doubt: the decision was not consensual between the two reviewers and the third was included as a tiebreaker criterion.
