# Supplementary material for: Effectiveness of self-management interventions in inflammatory arthritis: a systematic review informing the 2021 EULAR recommendations for the implementation of self-management strategies in patients with inflammatory arthritis
Source: PubMed Central journal article supplement (PMC8166594; doi:10.1136/rmdopen-2021-001647), 2021-05-28
Supplement: rmdopen-2021-001647supp004.pdf [file rmdopen-2021-001647supp004.pdf]

## Online supplementary material S4: Details of included studies

### Contents

|                                                         |    |
|---------------------------------------------------------|----|
| Systematic reviews.....                                 | 2  |
| Astin et al., 2002 .....                                | 2  |
| Cramp et al., 2013 .....                                | 3  |
| Carandang et al., 2016 .....                            | 4  |
| Cramer et al., 2013 .....                               | 5  |
| Dagfinrud et al., 2008.....                             | 6  |
| DiRenzo et al., 2018 .....                              | 7  |
| Dissanayake et al., 2010.....                           | 8  |
| Du et al., 2011 .....                                   | 9  |
| Knittle et al., 2010 .....                              | 10 |
| Lopes et al., 2016 .....                                | 11 |
| Mudano et al., 2019 .....                               | 12 |
| Pécourneau et al. 2018.....                             | 13 |
| Riemsma et al., 2003.....                               | 14 |
| <br>                                                    |    |
| Randomised controlled trials .....                      | 15 |
| Barlow et al., 1998 & Barlow et al., 1997 .....         | 15 |
| Barsky et al., 2010 .....                               | 16 |
| Basler et al., 1991 .....                               | 17 |
| El Miedany et al., 2012 .....                           | 18 |
| Evers et al., 2002.....                                 | 19 |
| Freeman et al., 2002.....                               | 20 |
| Giraudet-Le Quintrec et al., 2007.....                  | 21 |
| Hammond et al., 2008.....                               | 22 |
| Hewlett et al., 2011 .....                              | 23 |
| Hill et al., 2001 .....                                 | 24 |
| Knittle et al., 2013 .....                              | 25 |
| Lumley et al., 2014 .....                               | 26 |
| Manning et al., 2014 .....                              | 27 |
| Niedermann et al., 2011 & Niedermann et al., 2012 ..... | 28 |
| Seneca et al., 2015.....                                | 29 |
| Shearn et al., 1985 .....                               | 30 |
| Shigaki et al., 2013 .....                              | 31 |
| van Lankveld et al., 2004 .....                         | 32 |
| Zuidema et al 2019 .....                                | 33 |

### Abbreviations

|     |                               |       |                                   |
|-----|-------------------------------|-------|-----------------------------------|
| AS  | Ankylosing spondylitis        | PGA   | Patient global Assessment         |
| CBT | Cognitive behavioural therapy | PROMs | Patient reported outcome measures |
| FM  | Fibromyalgia                  | PsA   | Psoriatic arthritis               |
| g   | Hedges' g effect size         | RA    | Rheumatoid arthritis              |
| NA  | Not applicable                | RCT   | Randomised controlled trial       |
| NS  | Not Significant               | RPD   | Relative percentage difference    |
| OA  | Osteoarthritis                | SMD   | Standardised mean difference      |
| PE  | Patient education             | WMD   | Weighted mean difference          |

**Systematic reviews**

| <b>Astin et al., 2002</b>                                                                                                                                                            |                                                                                                                                                                                                                                                                                                                                                                                                                                                                    |                                                                                                                                                                                      |                                                                                                                                                                                                           |
|--------------------------------------------------------------------------------------------------------------------------------------------------------------------------------------|--------------------------------------------------------------------------------------------------------------------------------------------------------------------------------------------------------------------------------------------------------------------------------------------------------------------------------------------------------------------------------------------------------------------------------------------------------------------|--------------------------------------------------------------------------------------------------------------------------------------------------------------------------------------|-----------------------------------------------------------------------------------------------------------------------------------------------------------------------------------------------------------|
| Databases searched and language limits                                                                                                                                               | MEDLINE, PsychLit, EMBASE, CAM-PAIN, Science Citation Index, and Cochrane Library English language.                                                                                                                                                                                                                                                                                                                                                                |                                                                                                                                                                                      |                                                                                                                                                                                                           |
| Range of included studies                                                                                                                                                            | 1983-2001                                                                                                                                                                                                                                                                                                                                                                                                                                                          |                                                                                                                                                                                      |                                                                                                                                                                                                           |
| Number, type of studies included and countries of origin                                                                                                                             | 25 RCTs<br>Not stated                                                                                                                                                                                                                                                                                                                                                                                                                                              |                                                                                                                                                                                      |                                                                                                                                                                                                           |
| Instruments used for bias appraisal                                                                                                                                                  | Jadad scale (10-point quality rating scale)                                                                                                                                                                                                                                                                                                                                                                                                                        |                                                                                                                                                                                      |                                                                                                                                                                                                           |
| Bias appraisal rating                                                                                                                                                                | Mean score 5.84, range 3–9.                                                                                                                                                                                                                                                                                                                                                                                                                                        |                                                                                                                                                                                      |                                                                                                                                                                                                           |
| Participants characteristics (number, age, disease criteria, details)                                                                                                                | RA patients (n= 1,676)<br>Disease duration 10.6 years                                                                                                                                                                                                                                                                                                                                                                                                              |                                                                                                                                                                                      |                                                                                                                                                                                                           |
| Intervention(s)                                                                                                                                                                      | Psychological/psychosocial component beyond simply providing information (e.g., patient education) about the disease, characterized as multimodal, cognitive-behavioral interventions which involve the combination of relaxation, biofeedback, imagery, stress management, or the teaching of cognitive coping skills.                                                                                                                                            |                                                                                                                                                                                      |                                                                                                                                                                                                           |
| Intervention(s) characteristics                                                                                                                                                      | Group based (2 studies) and individual (3 studies)<br>Other characteristics not stated                                                                                                                                                                                                                                                                                                                                                                             |                                                                                                                                                                                      |                                                                                                                                                                                                           |
| Professional that promoted the interventions                                                                                                                                         | Not stated                                                                                                                                                                                                                                                                                                                                                                                                                                                         |                                                                                                                                                                                      |                                                                                                                                                                                                           |
| Intervention(s) setting                                                                                                                                                              | Not stated                                                                                                                                                                                                                                                                                                                                                                                                                                                         |                                                                                                                                                                                      |                                                                                                                                                                                                           |
| Control                                                                                                                                                                              | Usual medical care, Social support, Support group, Symptom monitoring wait list control, Occupational therapy, Attention control (education), Non-intervention control                                                                                                                                                                                                                                                                                             |                                                                                                                                                                                      |                                                                                                                                                                                                           |
| Outcomes of interest (types and measuring instruments)                                                                                                                               | Pain, functional disability (HAQ, AIMS, ...), psychological status (depression; measured by AIMS, BDI, CES-D), coping, self-efficacy (or helplessness; measured by ASES, AHI), and tender joints.                                                                                                                                                                                                                                                                  |                                                                                                                                                                                      |                                                                                                                                                                                                           |
| Methods of analysis                                                                                                                                                                  | Meta-analysis + Narrative synthesis                                                                                                                                                                                                                                                                                                                                                                                                                                |                                                                                                                                                                                      |                                                                                                                                                                                                           |
| Heterogeneity ( $I^2$ )                                                                                                                                                              | Q-test (NS).                                                                                                                                                                                                                                                                                                                                                                                                                                                       |                                                                                                                                                                                      |                                                                                                                                                                                                           |
| Effect size                                                                                                                                                                          | <table border="0"> <tr> <td>Pain (g=0.22)<br/>Functional disability (g=0.27)<br/>Tender joints (g=0.15)<br/>Psychological status (g=0.15)<br/>Coping (g=0.46)<br/>Self-efficacy (g=0.35).</td> <td>At follow-up:<br/>Pain (g=0.06)<br/>Functional disability (g=0.12)<br/>Tender joints (g=0.30)<br/>Psychological status (g=0.33)<br/>Coping (g=0.52)<br/>Self-efficacy (g=0.20).</td> </tr> </table>                                                             | Pain (g=0.22)<br>Functional disability (g=0.27)<br>Tender joints (g=0.15)<br>Psychological status (g=0.15)<br>Coping (g=0.46)<br>Self-efficacy (g=0.35).                             | At follow-up:<br>Pain (g=0.06)<br>Functional disability (g=0.12)<br>Tender joints (g=0.30)<br>Psychological status (g=0.33)<br>Coping (g=0.52)<br>Self-efficacy (g=0.20).                                 |
| Pain (g=0.22)<br>Functional disability (g=0.27)<br>Tender joints (g=0.15)<br>Psychological status (g=0.15)<br>Coping (g=0.46)<br>Self-efficacy (g=0.35).                             | At follow-up:<br>Pain (g=0.06)<br>Functional disability (g=0.12)<br>Tender joints (g=0.30)<br>Psychological status (g=0.33)<br>Coping (g=0.52)<br>Self-efficacy (g=0.20).                                                                                                                                                                                                                                                                                          |                                                                                                                                                                                      |                                                                                                                                                                                                           |
| 95% Confidence intervals                                                                                                                                                             | <table border="0"> <tr> <td>Pain 0.07 to 0.37<br/>Functional disability 0.12 to 0.42<br/>Tender joints -0.09 to -0.39<br/>Psychological status -0.01 to -0.31<br/>Coping 0.09 to 0.83<br/>Self-efficacy 0.11 to 0.59.</td> <td>At follow-up:<br/>Pain -0.17 to 0.29<br/>Functional disability -0.09 to -0.33<br/>Tender joints 0.04 to 0.56<br/>Psychological status -0.07 to -0.59<br/>Coping -0.07 to 1.11<br/>Self-efficacy -0.08 to -0.48.</td> </tr> </table> | Pain 0.07 to 0.37<br>Functional disability 0.12 to 0.42<br>Tender joints -0.09 to -0.39<br>Psychological status -0.01 to -0.31<br>Coping 0.09 to 0.83<br>Self-efficacy 0.11 to 0.59. | At follow-up:<br>Pain -0.17 to 0.29<br>Functional disability -0.09 to -0.33<br>Tender joints 0.04 to 0.56<br>Psychological status -0.07 to -0.59<br>Coping -0.07 to 1.11<br>Self-efficacy -0.08 to -0.48. |
| Pain 0.07 to 0.37<br>Functional disability 0.12 to 0.42<br>Tender joints -0.09 to -0.39<br>Psychological status -0.01 to -0.31<br>Coping 0.09 to 0.83<br>Self-efficacy 0.11 to 0.59. | At follow-up:<br>Pain -0.17 to 0.29<br>Functional disability -0.09 to -0.33<br>Tender joints 0.04 to 0.56<br>Psychological status -0.07 to -0.59<br>Coping -0.07 to 1.11<br>Self-efficacy -0.08 to -0.48.                                                                                                                                                                                                                                                          |                                                                                                                                                                                      |                                                                                                                                                                                                           |
| P value                                                                                                                                                                              | <table border="0"> <tr> <td>Pain 0.003<br/>Functional disability &lt;0.005<br/>Tender joints NS<br/>Psychological status 0.03<br/>Coping 0.007<br/>Self-efficacy 0.02.</td> <td>At follow-up:<br/>Pain NS<br/>Functional disability NS<br/>Tender joints 0.005<br/>Psychological status 0.01<br/>Coping 0.04 and Self-efficacy NS.</td> </tr> </table>                                                                                                             | Pain 0.003<br>Functional disability <0.005<br>Tender joints NS<br>Psychological status 0.03<br>Coping 0.007<br>Self-efficacy 0.02.                                                   | At follow-up:<br>Pain NS<br>Functional disability NS<br>Tender joints 0.005<br>Psychological status 0.01<br>Coping 0.04 and Self-efficacy NS.                                                             |
| Pain 0.003<br>Functional disability <0.005<br>Tender joints NS<br>Psychological status 0.03<br>Coping 0.007<br>Self-efficacy 0.02.                                                   | At follow-up:<br>Pain NS<br>Functional disability NS<br>Tender joints 0.005<br>Psychological status 0.01<br>Coping 0.04 and Self-efficacy NS.                                                                                                                                                                                                                                                                                                                      |                                                                                                                                                                                      |                                                                                                                                                                                                           |
| Follow-up                                                                                                                                                                            | Length of the interventions ranging from 3 days to 9 months with a mean of 9.8 weeks. Follow-up time periods ranging from 2 to 18 months (mean of 8.6).                                                                                                                                                                                                                                                                                                            |                                                                                                                                                                                      |                                                                                                                                                                                                           |
| Conclusions                                                                                                                                                                          | Psychological interventions may be important adjunctive therapies in the medical management of RA.                                                                                                                                                                                                                                                                                                                                                                 |                                                                                                                                                                                      |                                                                                                                                                                                                           |

| <b>Cramp et al., 2013</b>                                             |                                                                                                                                                                                                                                                                                                                                                                                                                                                                                                                                                                             |
|-----------------------------------------------------------------------|-----------------------------------------------------------------------------------------------------------------------------------------------------------------------------------------------------------------------------------------------------------------------------------------------------------------------------------------------------------------------------------------------------------------------------------------------------------------------------------------------------------------------------------------------------------------------------|
| Databases searched and language limits                                | Cochrane Central Register of Controlled Trials, MEDLINE, EMBASE, AMED, CINAHL, PsycINFO, Social Science Citation Index, Web of Science, Dissertation Abstracts International, Current Controlled Trials Register (USA), The National Research Register (NRR) Archive (UK), The UKCRN Portfolio Database (UK)<br>English (other languages are not stated)                                                                                                                                                                                                                    |
| Range of included studies                                             | 1985 - 2012                                                                                                                                                                                                                                                                                                                                                                                                                                                                                                                                                                 |
| Number, type of studies included and countries of origin              | 24 RCTs<br>Countries not stated                                                                                                                                                                                                                                                                                                                                                                                                                                                                                                                                             |
| Instruments used for bias appraisal                                   | Cochrane Collaboration appraisal tools                                                                                                                                                                                                                                                                                                                                                                                                                                                                                                                                      |
| Bias appraisal rating                                                 | Quality of the evidence ranged from moderate quality for physical activity interventions and Mediterranean diet to low quality for psychosocial interventions and all other interventions.                                                                                                                                                                                                                                                                                                                                                                                  |
| Participants characteristics (number, age, disease criteria, details) | RA patients (n=2882)<br>Age 18-70 years<br>ACR criteria                                                                                                                                                                                                                                                                                                                                                                                                                                                                                                                     |
| Intervention(s)                                                       | 6 × Physical activity interventions (pool-based therapy, Yoga, strength training, stationary cycling, aerobic exercise, Tai Chi)<br>13 × Psychosocial interventions (expressive writing, cognitive skills training, 2 × cognitive behavioral therapy, mindfulness, lifestyle management, education incorporating energy conservation, 3 × education incorporating self-management, 3 × group education)<br>1 × Herbal medicine<br>1 × Omega-3 fatty acid supplementation<br>1 × Mediterranean diet<br>1 × Reflexology<br>1 × Health Tracker information                     |
| Intervention(s) characteristics                                       | Frequency 2-3 times a daily<br>Duration 20 min-4.5 hours<br>Intensity moderate (majority unstated)                                                                                                                                                                                                                                                                                                                                                                                                                                                                          |
| Professional that promoted the interventions                          | Yoga teachers, Physiotherapists, Occupational therapists, Clinical psychologists, Nurses, Dieticians                                                                                                                                                                                                                                                                                                                                                                                                                                                                        |
| Intervention(s) setting                                               | Class - at a fitness centre, Home, majority unstated                                                                                                                                                                                                                                                                                                                                                                                                                                                                                                                        |
| Control                                                               | Not stated                                                                                                                                                                                                                                                                                                                                                                                                                                                                                                                                                                  |
| Outcomes of interest (types and measuring instruments)                | Fatigue [VAS, SF-36, the Multidimensional Assessment of Fatigue (MAF), Profile of Mood States (POMS), FACIT-F, Checklist Individual Strength (CIS), and the perception of change in fatigue from baseline using a four-point Likert scale]<br>Pain [VAS or NRS, Likert scale, short-form McGill Pain Questionnaire, AIMS2, the Impact of Rheumatic Diseases on General Health and Lifestyle (IRGL), Pain Disability Index, the Bodily Pain subscale of the SF-36, and the Manchester Foot Pain Disability Questionnaire]<br>Functional disability (HAQ, IRGL and the AIMS2) |
| Methods of analysis                                                   | Meta-analysis + Narrative synthesis                                                                                                                                                                                                                                                                                                                                                                                                                                                                                                                                         |
| Heterogeneity ( $I^2$ )                                               | Fatigue: Physical activity interventions 27% low<br>Fatigue: Psychosocial interventions 55% moderate                                                                                                                                                                                                                                                                                                                                                                                                                                                                        |
| Effect size                                                           | Fatigue: Physical activity interventions (n=371) SMD= -0.36 small<br>Fatigue: Psychosocial interventions (n=1556) SMD= -0.24 small<br>For the remaining interventions/ outcomes meta-analysis was not possible and there was either no statistically significant difference between trial arms or findings were not reported.                                                                                                                                                                                                                                               |
| 95% Confidence intervals                                              | Fatigue: Physical activity interventions -0.62 to -0.10<br>Fatigue: Psychosocial interventions -0.40 to -0.07                                                                                                                                                                                                                                                                                                                                                                                                                                                               |
| P value                                                               | Fatigue: Physical activity interventions 0.0066<br>Fatigue: Psychosocial interventions 0.0044                                                                                                                                                                                                                                                                                                                                                                                                                                                                               |
| Follow-up                                                             | 3 - 24 months                                                                                                                                                                                                                                                                                                                                                                                                                                                                                                                                                               |
| Conclusions                                                           | Physical activity and psychosocial interventions provide benefit in relation to self-reported fatigue in adults with rheumatoid arthritis. There is currently insufficient evidence of the effectiveness of other non-pharmacological interventions.                                                                                                                                                                                                                                                                                                                        |

| <b>Carandang et al., 2016</b>                                         |                                                                                                                                                                                                                                                                                                           |
|-----------------------------------------------------------------------|-----------------------------------------------------------------------------------------------------------------------------------------------------------------------------------------------------------------------------------------------------------------------------------------------------------|
| Databases searched and language limits                                | MEDLINE and CINAHL.<br>English language.                                                                                                                                                                                                                                                                  |
| Range of included studies                                             | January 2002 - June 2015                                                                                                                                                                                                                                                                                  |
| Number, type of studies included and countries of origin              | 22 RCTs<br>Countries not stated                                                                                                                                                                                                                                                                           |
| Instruments used for bias appraisal                                   | Cochrane Collaboration appraisal tools                                                                                                                                                                                                                                                                    |
| Bias appraisal rating                                                 | 12 studies have low risk of bias,<br>3 studies had high risk of bias,<br>7 studies had unknown risk of bias.                                                                                                                                                                                              |
| Participants characteristics (number, age, disease criteria, details) | RA patients (n=2600)<br>Age >18 years<br>ACR criteria                                                                                                                                                                                                                                                     |
| Intervention(s)                                                       | Educational Interventions, Joint protection and energy conservation, Disease education, Pain management, Range of motion and strengthening, Provision of orthoses, Physical agent modalities, Cognitive rehabilitation, Environmental adaptation, Provision of adaptive equipment, Maintaining activities |
| Intervention(s) characteristics                                       | Not stated                                                                                                                                                                                                                                                                                                |
| Professional that promoted the interventions                          | Occupational therapists                                                                                                                                                                                                                                                                                   |
| Intervention(s) setting                                               | Not stated                                                                                                                                                                                                                                                                                                |
| Control                                                               | Not stated                                                                                                                                                                                                                                                                                                |
| Outcomes of interest (types and measuring instruments)                | Pain and Fatigue                                                                                                                                                                                                                                                                                          |
| Methods of analysis                                                   | Narrative synthesis                                                                                                                                                                                                                                                                                       |
| Heterogeneity ( $I^2$ )                                               | NA                                                                                                                                                                                                                                                                                                        |
| Effect size                                                           | NA                                                                                                                                                                                                                                                                                                        |
| 95% Confidence intervals                                              | NA                                                                                                                                                                                                                                                                                                        |
| P value                                                               | NA                                                                                                                                                                                                                                                                                                        |
| Follow-up                                                             | NA                                                                                                                                                                                                                                                                                                        |
| Conclusions                                                           | Interventions in which a combination of educational techniques is used may complement pharmacological therapies in the care of people with RA.                                                                                                                                                            |

| <b>Cramer et al., 2013</b>                                            |                                                                                                                  |
|-----------------------------------------------------------------------|------------------------------------------------------------------------------------------------------------------|
| Databases searched and language limits                                | Medline/PubMed, Scopus, the Cochrane Library and IndMED<br>Language limits not stated                            |
| Range of included studies                                             | Through 11 February 2013                                                                                         |
| Number, type of studies included and countries of origin              | 8 RCTs (only 2 in RA)<br>USA, Brazil and India.                                                                  |
| Instruments used for bias appraisal                                   | Cochrane Collaboration appraisal tools                                                                           |
| Bias appraisal rating                                                 | Quality of the evidence ranged from low to high.<br>The two RCTs in RA had high risk of bias.                    |
| Participants characteristics (number, age, disease criteria, details) | RA patients (n=110)<br>Aged between 29 and 35 years<br>70% female                                                |
| Intervention(s)                                                       | Yoga, including postures, cleansing practices, breathing techniques, meditation, lifestyle advice and relaxation |
| Intervention(s) characteristics                                       | 180-540 min/week                                                                                                 |
| Professional that promoted the interventions                          | Not stated                                                                                                       |
| Intervention(s) setting                                               | Not stated                                                                                                       |
| Control                                                               | Usual care                                                                                                       |
| Outcomes of interest (types and measuring instruments)                | Pain (SDPIS), Disability (PDI, HAQ-DI), quality of life (SF-36), distress (BSI)                                  |
| Methods of analysis                                                   | Narrative synthesis                                                                                              |
| Heterogeneity (I <sup>2</sup> )                                       | NA                                                                                                               |
| Effect size                                                           | NA                                                                                                               |
| 95% Confidence intervals                                              | NA                                                                                                               |
| P value                                                               | NA                                                                                                               |
| Follow-up                                                             | 6-7 weeks                                                                                                        |
| Conclusions                                                           | Weak recommendations can be made for the ancillary use of yoga in the management of FM syndrome, OA and RA.      |

| <b>Dagfinrud et al., 2008</b>                                         |                                                                                                                                                                                                                                                                               |
|-----------------------------------------------------------------------|-------------------------------------------------------------------------------------------------------------------------------------------------------------------------------------------------------------------------------------------------------------------------------|
| Databases searched and language limits                                | Cochrane Central Register of Controlled Trials (CENTRAL), MEDLINE, EMBASE, AMED, CINAHL and PEDro<br>No language restrictions                                                                                                                                                 |
| Range of included studies                                             | Up to January 2007                                                                                                                                                                                                                                                            |
| Number, type of studies included and countries of origin              | 11 RCTs<br>Netherlands, Spain, UK, Turkey, Canada, Korea                                                                                                                                                                                                                      |
| Instruments used for bias appraisal                                   | Cochrane Collaboration appraisal tools                                                                                                                                                                                                                                        |
| Bias appraisal rating                                                 | Quality of the evidence ranged from low to moderate.                                                                                                                                                                                                                          |
| Participants characteristics (number, age, disease criteria, details) | Ankylosing Spondylitis patients (AS)(n=763)<br>Aged between 13-69 years<br>67-93% men<br>Modified New York criteria                                                                                                                                                           |
| Intervention(s)                                                       | Physiotherapy modalities: supervised and unsupervised exercises, training, manual therapy, massage, hydrotherapy, electrotherapy, acupuncture, patient information, and educational programs                                                                                  |
| Intervention(s) characteristics                                       | Mainly 30-60 min/day, 1-5 days/week                                                                                                                                                                                                                                           |
| Professional that promoted the interventions                          | Not stated                                                                                                                                                                                                                                                                    |
| Intervention(s) setting                                               | Home, hospitals, Spas.                                                                                                                                                                                                                                                        |
| Control                                                               | Exercise programs, home exercise regimes, no intervention                                                                                                                                                                                                                     |
| Outcomes of interest (types and measuring instruments)                | Pain (VAS pain), Stiffness (BASDAI), Spinal mobility (fingertip-to-floor distance - FFD), Physical function (modified Toronto Activities of Daily Living Questionnaire, BASFI), Patient global assessment, other relevant outcome measures                                    |
| Methods of analysis                                                   | Meta-analysis + Narrative synthesis                                                                                                                                                                                                                                           |
| Heterogeneity (I2)                                                    | NA                                                                                                                                                                                                                                                                            |
| Effect size                                                           | Spinal mobility (Relative percentage differences -RPDs from 5-50%)<br>Pain (18%)<br>Physical function (24%)<br>PGA (27%)<br>Physical function (four points on a 33-point scale).                                                                                              |
| 95% Confidence intervals                                              | NA                                                                                                                                                                                                                                                                            |
| P value                                                               | NA                                                                                                                                                                                                                                                                            |
| Follow-up                                                             | 2-32 weeks                                                                                                                                                                                                                                                                    |
| Conclusions                                                           | Individual home-based or supervised exercise program is better than no intervention; Supervised group physiotherapy is better than home exercises; and that combined inpatient spa-exercise therapy followed by group physiotherapy is better than group physiotherapy alone. |

| <b>DiRenzo et al., 2018</b>                                           |                                                                                                                                                                                                                                                                                                                                |
|-----------------------------------------------------------------------|--------------------------------------------------------------------------------------------------------------------------------------------------------------------------------------------------------------------------------------------------------------------------------------------------------------------------------|
| Databases searched and language limits                                | Medline (PubMed), Embase, Web of Science, Cumulative Index of Nursing and Allied Health Literature (CINAHL, Ebsco), Cochrane Central Register of Controlled Trials, and PsycINFO (Ebsco).<br>English language only                                                                                                             |
| Range of included studies                                             | Through April 2018                                                                                                                                                                                                                                                                                                             |
| Number, type of studies included and countries of origin              | 5 RCTs<br>USA, England, Norway, New Zealand.                                                                                                                                                                                                                                                                                   |
| Instruments used for bias appraisal                                   | Cochrane Collaboration appraisal tools                                                                                                                                                                                                                                                                                         |
| Bias appraisal rating                                                 | Low bias                                                                                                                                                                                                                                                                                                                       |
| Participants characteristics (number, age, disease criteria, details) | Mainly RA patients, AS, PSA (n=399)<br>% Male 10.2-31.9%<br>Mean age 54<br>ACR criteria                                                                                                                                                                                                                                        |
| Intervention(s)                                                       | Mindfulness-Based Interventions (Mindfulness-based stress Reduction, Mindful awareness and acceptance therapy, Vitality training program and Internal family systems)                                                                                                                                                          |
| Intervention(s) characteristics                                       | Standardized program developed at the University of Massachusetts Medical School which consists of a 2.5 hour introductory session, 7 weekly 2.5 hour active session, and a 4-h silent retreat.<br>Sessions consist of a variety of mindfulness activities such as guided imagery, body scan, mindful eating, and gentle yoga. |
| Professional that promoted the interventions                          | Psychologists, health professionals and trained therapists                                                                                                                                                                                                                                                                     |
| Intervention(s) setting                                               | Not stated                                                                                                                                                                                                                                                                                                                     |
| Control                                                               | Education, CBT, usual care                                                                                                                                                                                                                                                                                                     |
| Outcomes of interest (types and measuring instruments)                | Depressive symptoms (SCL-90-R); Psychologic distress (SCL-90R:General Severity Index, GHQ-20); Anxiety (PANAS-X: Anxious Affect, State-Trait Anxiety Inventory); Self-efficacy and emotional processing (Arthritis Self-Efficacy Scale, Emotion Approach Coping Scale)                                                         |
| Methods of analysis                                                   | Meta-analysis + Narrative synthesis                                                                                                                                                                                                                                                                                            |
| Heterogeneity ( $I^2$ )                                               | DAS28-CRP 0%<br>Pain 0%                                                                                                                                                                                                                                                                                                        |
| Effect size                                                           | DAS28-CRP -0.44<br>Pain -0.58                                                                                                                                                                                                                                                                                                  |
| 95% Confidence intervals                                              | DAS28-CRP -0.99 to 0.12<br>Pain -1.26 to 0.10                                                                                                                                                                                                                                                                                  |
| P value                                                               | DAS28-CRP 0.13<br>Pain 0.09                                                                                                                                                                                                                                                                                                    |
| Follow-up                                                             | 8-36 weeks                                                                                                                                                                                                                                                                                                                     |
| Conclusions                                                           | Mindfulness-Based Interventions may be a useful strategy to improve psychological distress in those with RA.                                                                                                                                                                                                                   |

| <b><i>Dissanayake et al., 2010</i></b>                                |                                                                                                                                                                          |
|-----------------------------------------------------------------------|--------------------------------------------------------------------------------------------------------------------------------------------------------------------------|
| Databases searched and language limits                                | MEDLINE, EMBASE and the Cochrane Central Register of Controlled Trials<br>English language only                                                                          |
| Range of included studies                                             | 1981 and 2009                                                                                                                                                            |
| Number, type of studies included and countries of origin              | 31 RCTs<br>Countries not stated                                                                                                                                          |
| Instruments used for bias appraisal                                   | Adapted Cochrane Collaboration appraisal tools                                                                                                                           |
| Bias appraisal rating                                                 | Score 4-9                                                                                                                                                                |
| Participants characteristics (number, age, disease criteria, details) | RA patients (n= 2021)<br>Not stated                                                                                                                                      |
| Intervention(s)                                                       | Psychosocial interventions (Counselling, Psychotherapy, Mindfulness Meditation, CBT, Biofeedback, Relaxation therapy, Disclosure)                                        |
| Intervention(s) characteristics                                       | Duration – 1 days to 24 weeks                                                                                                                                            |
| Professional that promoted the interventions                          | Not stated                                                                                                                                                               |
| Intervention(s) setting                                               | Not stated                                                                                                                                                               |
| Control                                                               | Standard medical care, wait list.                                                                                                                                        |
| Outcomes of interest (types and measuring instruments)                | Pain, anxiety, depression, self-care, fatigue, physical function, psychological wellbeing, swelling, joint count, coping.                                                |
| Methods of analysis                                                   | Narrative synthesis                                                                                                                                                      |
| Heterogeneity (I <sup>2</sup> )                                       | NA                                                                                                                                                                       |
| Effect size                                                           | Improved self-care, self-efficacy, knowledge, and greater use of health behaviours.<br>Improved self-efficacy in management of pain, function and general effects of RA. |
| 95% Confidence intervals                                              | NA                                                                                                                                                                       |
| P value                                                               | NA                                                                                                                                                                       |
| Follow-up                                                             | 1-60 months                                                                                                                                                              |
| Conclusions                                                           | There is supportive evidence for the use of disclosure therapy, and CBT with maintenance therapy as adjunct therapies in patients with RA.                               |



| <b>Du et al., 2011</b>                                                |                                                                                                                                                                                                               |
|-----------------------------------------------------------------------|---------------------------------------------------------------------------------------------------------------------------------------------------------------------------------------------------------------|
| Databases searched and language limits                                | Medline and Embase<br>English language only                                                                                                                                                                   |
| Range of included studies                                             | 1970 – March 2010                                                                                                                                                                                             |
| Number, type of studies included and countries of origin              | 19 RCTs<br>USA, UK, Netherlands, Switzerland, Canada, Hong Kong and Sweden                                                                                                                                    |
| Instruments used for bias appraisal                                   | Cochrane Collaboration appraisal tools                                                                                                                                                                        |
| Bias appraisal rating                                                 | 5 studies as A quality level, 14 studies as B quality level.                                                                                                                                                  |
| Participants characteristics (number, age, disease criteria, details) | Chronic musculoskeletal pain conditions include arthritis (OA, RA and PsA), and other (FM, back pain, shoulder pain, neck pain...) (n=6334)<br>Mean age 59                                                    |
| Intervention(s)                                                       | Self-management programs (including swimming sessions, relaxation, exercises, low impact land-based exercises, sessions on activities of daily living and education-discussion sessions, walking and Tai Chi) |
| Intervention(s) characteristics                                       | Duration: 6 sessions-18 weeks                                                                                                                                                                                 |
| Professional that promoted the interventions                          | Pairs of lay leaders, physiotherapists, non-specific health care professionals                                                                                                                                |
| Intervention(s) setting                                               | Home, remaining not stated                                                                                                                                                                                    |
| Control                                                               | Waiting-list control, education booklet, usual care, standard programs, no treatment                                                                                                                          |
| Outcomes of interest (types and measuring instruments)                | Arthritis-related pain, Arthritis-related disability, Adverse event in self-management programs                                                                                                               |
| Methods of analysis                                                   | Meta-analysis + Narrative synthesis                                                                                                                                                                           |
| Heterogeneity (I <sup>2</sup> )                                       | Pain at 4 months: 60%<br>Pain at 6 months: 0%<br>Pain at 12 months: 0%<br>Disability at 4 months: 39%                                                                                                         |
| Effect size                                                           | Pain at 4 months: -0.23<br>Pain at 6 months: -0.29<br>Pain at 12 months: -0.14<br>Disability at 4 months: -0.06                                                                                               |
| 95% Confidence intervals                                              | Pain at 4 months: -0.36 to -0.10<br>Pain at 6 months: -0.41 to 0.17<br>Pain at 12 months: -0.23 to -0.04<br>Disability at 4 months: -0.17 to 0.05                                                             |
| P value                                                               | Pain at 4 months: <0.005<br>Pain at 6 months: <0.005<br>Pain at 12 months: 0.008<br>Disability at 4 months: 0.26                                                                                              |
| Follow-up                                                             | 2-36 months                                                                                                                                                                                                   |
| Conclusions                                                           | Self-management is a safe, community-based and effective way for patients with arthritis to manage pain and disability.<br>Core skills of self-management should be delivered using multiple approaches.      |

| <b>Knittle et al., 2010</b>                                           |                                                                                                                                                                                                                                                                                                                                                  |
|-----------------------------------------------------------------------|--------------------------------------------------------------------------------------------------------------------------------------------------------------------------------------------------------------------------------------------------------------------------------------------------------------------------------------------------|
| Databases searched and language limits                                | PsycINFO, MEDLINE, the central catalog of Dutch libraries<br>English or Dutch                                                                                                                                                                                                                                                                    |
| Range of included studies                                             | 1981-2007                                                                                                                                                                                                                                                                                                                                        |
| Number, type of studies included and countries of origin              | 27 RCTs<br>US, UK, Netherlands, Canada, Sweden, Austria                                                                                                                                                                                                                                                                                          |
| Instruments used for bias appraisal                                   | Adapted 29-item version of the Cochrane Collaboration Depression Anxiety, and Neurosis Review Group scale                                                                                                                                                                                                                                        |
| Bias appraisal rating                                                 | Scores between 21-42                                                                                                                                                                                                                                                                                                                             |
| Participants characteristics (number, age, disease criteria, details) | Number of participants and characteristics not stated<br>RA patients (ACR criteria or defined by the ARA)                                                                                                                                                                                                                                        |
| Intervention(s)                                                       | Relaxation, Cognitive pain management strategies, Self-Management Program, Cognitive-behavioural therapy, Education, Contracting, Goal setting, Provision of feedback, Cognitive restructuring, Joint protection, Problem solving, Exercise, Coping, Group counselling, Guided imagery, Self-instruction, Range of motion exercises, Mindfulness |
| Intervention(s) characteristics                                       | Frequency 1-5 times per week<br>Duration 30 min-2.5 hours<br>Intensity not stated                                                                                                                                                                                                                                                                |
| Professional that promoted the interventions                          | PhD student, Layperson, Psychologist, Medical doctor, Occupational therapist, Physical therapist, Nurse, Counsellor, Dietician                                                                                                                                                                                                                   |
| Intervention(s) setting                                               | Home, majority unstated                                                                                                                                                                                                                                                                                                                          |
| Control                                                               | Education or no intervention                                                                                                                                                                                                                                                                                                                     |
| Outcomes of interest (types and measuring instruments)                | Pain (VAS)<br>Disability (HAQ)<br>Depressive and anxiety symptoms (HADS, STAI, BDI, ZDS, DS, CES-D, SCL90-R)                                                                                                                                                                                                                                     |
| Methods of analysis                                                   | Meta-analysis + Narrative synthesis                                                                                                                                                                                                                                                                                                              |
| Heterogeneity ( $I^2$ )                                               | Pain 0%, Disability 60.26%, Depressive symptoms 46.95%, Anxiety 0%                                                                                                                                                                                                                                                                               |
| Effect size                                                           | Pain $g=0.18$<br>Disability $g=0.32$ ,<br>Physical activity $g=0.45$<br>Depressive symptoms $g=0.23$<br>Anxiety $g=0.17$ .<br>At follow-up:<br>Pain $g=0.13$<br>Disability $g=0.15$<br>Physical activity $g=0.36$<br>Depressive symptoms $g=0.32$<br>Anxiety $g=0.12$ .                                                                          |
| 95% Confidence intervals                                              | Pain 0.08 to 0.29<br>Disability 0.13 to 0.51<br>Physical activity 0.11 to 0.82<br>Depressive symptoms 0.05 to 0.50<br>Anxiety -0.06 to 0.30<br>At follow-up<br>Pain 0.01 to 0.26<br>Disability 0.002 to 0.28<br>Physical activity 0.05 to 0.66<br>Depressive symptoms 0.16 to 0.48<br>Anxiety -0.06 to 0.30.                                     |
| P value                                                               | Pain 0.006<br>Disability 0.001<br>Physical activity 0.01<br>Depressive symptoms 0.01<br>Anxiety 0.20.<br>At follow-up Pain 0.006<br>Disability 0.05<br>Physical activity 0.02<br>Depressive symptoms <0.005<br>Anxiety 0.02.                                                                                                                     |
| Follow-up                                                             | 2-16 weeks                                                                                                                                                                                                                                                                                                                                       |
| Conclusions                                                           | Psychological interventions are beneficial for many patients with RA, particularly when it comes to increasing physical activity levels.                                                                                                                                                                                                         |

| <b>Lopes et al., 2016</b>                                             |                                                                                                                                                                                                        |
|-----------------------------------------------------------------------|--------------------------------------------------------------------------------------------------------------------------------------------------------------------------------------------------------|
| Databases searched and language limits                                | PubMed/MEDLINE<br>English language only                                                                                                                                                                |
| Range of included studies                                             | January 2004 - January 2014                                                                                                                                                                            |
| Number, type of studies included and countries of origin              | 8 RCTs<br>Not stated                                                                                                                                                                                   |
| Instruments used for bias appraisal                                   | PEDro                                                                                                                                                                                                  |
| Bias appraisal rating                                                 | Score 5-7                                                                                                                                                                                              |
| Participants characteristics (number, age, disease criteria, details) | AS patients (n=345)                                                                                                                                                                                    |
| Intervention(s)                                                       | Exercise programs                                                                                                                                                                                      |
| Intervention(s) characteristics                                       | 20 min-1h per day, 8-16 weeks                                                                                                                                                                          |
| Professional that promoted the interventions                          | Not stated                                                                                                                                                                                             |
| Intervention(s) setting                                               | Home, remaining not stated                                                                                                                                                                             |
| Control                                                               | No treatment, education session, conventional exercise                                                                                                                                                 |
| Outcomes of interest (types and measuring instruments)                | BASMI, BASFI, BASDAI, FFD, VAS, BDI, BAS-G, ASQOL                                                                                                                                                      |
| Methods of analysis                                                   | Narrative synthesis                                                                                                                                                                                    |
| Heterogeneity (I <sup>2</sup> )                                       | NA                                                                                                                                                                                                     |
| Effect size                                                           | NA                                                                                                                                                                                                     |
| 95% Confidence intervals                                              | NA                                                                                                                                                                                                     |
| P value                                                               | NA                                                                                                                                                                                                     |
| Follow-up                                                             | 12 weeks-12 months                                                                                                                                                                                     |
| Conclusions                                                           | Exercise group programmes are more effective than home-based ones in patients with AS.<br>It could be advantageous to carry out home-based exercise programs than the absence of any exercise program. |

| <b>Mudano et al., 2019</b>                                            |                                                                                                                                                                                                                                 |
|-----------------------------------------------------------------------|---------------------------------------------------------------------------------------------------------------------------------------------------------------------------------------------------------------------------------|
| Databases searched and language limits                                | CENTRAL, MEDLINE, Embase, and clinical trial registries<br>Not stated                                                                                                                                                           |
| Range of included studies                                             | 2002 to September 2018.                                                                                                                                                                                                         |
| Number, type of studies included and countries of origin              | 7 RCTs (n=345)<br>China, South Korea, and the USA                                                                                                                                                                               |
| Instruments used for bias appraisal                                   | Cochrane Collaboration appraisal tools                                                                                                                                                                                          |
| Bias appraisal rating                                                 | The quality of the evidence was low or very low for all major outcomes.                                                                                                                                                         |
| Participants characteristics (number, age, disease criteria, details) | RA adult patients<br>Mostly women<br>Age ranging from 16 to 80 years<br>ACR criteria                                                                                                                                            |
| Intervention(s)                                                       | Exercise programs with Tai Chi instruction, or exercises that incorporated principles of Tai Chi training                                                                                                                       |
| Intervention(s) characteristics                                       | Duration: 8 to 12 weeks                                                                                                                                                                                                         |
| Professional that promoted the interventions                          | Not stated                                                                                                                                                                                                                      |
| Intervention(s) setting                                               | Hospital                                                                                                                                                                                                                        |
| Control                                                               | Non-exercise or alternative exercise method                                                                                                                                                                                     |
| Outcomes of interest (types and measuring instruments)                | Pain, disease activity (DAS-28-ESR), function (HAQ), and radiographic progression                                                                                                                                               |
| Methods of analysis                                                   | Meta-analysis + Narrative synthesis                                                                                                                                                                                             |
| Heterogeneity ( $I^2$ )                                               | Pain 0%<br>DAS-28-ESR NA<br>HAQ 82%                                                                                                                                                                                             |
| Effect size                                                           | Pain: MD -2.15<br>DAS-28-ESR: MD -0.4<br>HAQ: MD -0.33<br>Non significance for number of tender and swollen joints, grip strength.                                                                                              |
| 95% Confidence intervals                                              | Pain -3.19 to -1.11<br>DAS-28-ESR -1.1 to 0.3<br>HAQ -0.79 to 0.12                                                                                                                                                              |
| P value                                                               | Pain <0.005<br>DAS-28-ESR 0.26<br>HAQ 0.15                                                                                                                                                                                      |
| Follow-up                                                             | 8-24 weeks                                                                                                                                                                                                                      |
| Conclusions                                                           | It is uncertain whether Tai Chi has any effect on clinical outcomes (joint pain, activity limitation, function) in RA, and important effects cannot be confirmed or excluded, since all outcomes had very low-quality evidence. |

| <b>Pécourneau et al. 2018</b>                                         |                                                                                                                                                       |
|-----------------------------------------------------------------------|-------------------------------------------------------------------------------------------------------------------------------------------------------|
| Databases searched and language limits                                | Medline via PubMed and Cochrane Library<br>English or French language only                                                                            |
| Range of included studies                                             | January 1980 to May 2017                                                                                                                              |
| Number, type of studies included and countries of origin              | 8 RCTs (n=331)<br>Spain, Turkey, Italy, Norway                                                                                                        |
| Instruments used for bias appraisal                                   | Jadad score                                                                                                                                           |
| Bias appraisal rating                                                 | Mean Jadad score 2.1 (range 1 to 3)                                                                                                                   |
| Participants characteristics (number, age, disease criteria, details) | AS adult patients (as by ASAS criteria for axial spondyloarthritis or the modified New York criteria)                                                 |
| Intervention(s)                                                       | Modalities of exercise: specific exercise (swimming, aerobic etc.), home-based exercise program, and supervised exercise by healthcare professionals. |
| Intervention(s) characteristics                                       | Frequency: 1-6 per week<br>Session duration: 20-90 min<br>Program duration: 3-16 weeks                                                                |
| Professional that promoted the interventions                          | Physiotherapist, certified coach.                                                                                                                     |
| Intervention(s) setting                                               | Home, pool, sports room                                                                                                                               |
| Control                                                               | Physical therapy, usual care, education                                                                                                               |
| Outcomes of interest (types and measuring instruments)                | BASDAI, BASFI                                                                                                                                         |
| Methods of analysis                                                   | Meta-analysis + Narrative synthesis                                                                                                                   |
| Heterogeneity ( $I^2$ )                                               | BASDAI: 69%<br>BASFI: 0%                                                                                                                              |
| Effect size                                                           | BASDAI: WMD -0.90<br>BASFI: WMD -0.72                                                                                                                 |
| 95% Confidence intervals                                              | BASDAI: -1.52 to -0.27<br>BASFI: -1.03 to -0.40                                                                                                       |
| P value                                                               | BASDAI: 0.005<br>BASFI: <0.005                                                                                                                        |
| Follow-up                                                             | Not stated                                                                                                                                            |
| Conclusions                                                           | Exercise programmes improve disease activity and body function in AS.                                                                                 |

| <b>Riemsma et al., 2003</b>                                           |                                                                                                                                                                                                                                                                                                                                                                                                        |
|-----------------------------------------------------------------------|--------------------------------------------------------------------------------------------------------------------------------------------------------------------------------------------------------------------------------------------------------------------------------------------------------------------------------------------------------------------------------------------------------|
| Databases searched and language limits                                | MEDLINE, EMBASE and PsycINFO and the Cochrane Controlled Trials Register<br>No language restriction                                                                                                                                                                                                                                                                                                    |
| Range of included studies                                             | 1966 forward to September 2002                                                                                                                                                                                                                                                                                                                                                                         |
| Number, type of studies included and countries of origin              | 50 RCTs<br>Countries not stated                                                                                                                                                                                                                                                                                                                                                                        |
| Instruments used for bias appraisal                                   | Adapted Jadad score                                                                                                                                                                                                                                                                                                                                                                                    |
| Bias appraisal rating                                                 | Range 0 to 7                                                                                                                                                                                                                                                                                                                                                                                           |
| Participants characteristics (number, age, disease criteria, details) | Adult RA patients<br>Mean age of 56 years<br>53.5% female<br>ACR criteria                                                                                                                                                                                                                                                                                                                              |
| Intervention(s)                                                       | Patient Education, Information Only, Counselling, Behavioural Treatment                                                                                                                                                                                                                                                                                                                                |
| Intervention(s) characteristics                                       | Developed over several sessions and periods of different duration                                                                                                                                                                                                                                                                                                                                      |
| Professional that promoted the interventions                          | Not stated                                                                                                                                                                                                                                                                                                                                                                                             |
| Intervention(s) setting                                               | Not stated                                                                                                                                                                                                                                                                                                                                                                                             |
| Control                                                               | Symptom monitoring, no-intervention, waiting list controls, standard rheumatologic care, lecture (90 min) on pain management                                                                                                                                                                                                                                                                           |
| Outcomes of interest (types and measuring instruments)                | Pain (VAS), psychological status, anxiety, and depression (HADS, CES-D, ZSRDS), AIMS, Disability (HAQ), Disease activity (ESR, CRP)                                                                                                                                                                                                                                                                    |
| Methods of analysis                                                   | Meta-analysis + Narrative synthesis                                                                                                                                                                                                                                                                                                                                                                    |
| Heterogeneity ( $I^2$ )                                               | Disability 20%<br>Joint counts 0%<br>PGA 0%<br>Psychological status 0%<br>Depression 0%                                                                                                                                                                                                                                                                                                                |
| Effect size                                                           | Disability: SMD = -0.17<br>Joint counts: SMD = -0.13<br>PGA: SMD = -0.28<br>Psychological status: SMD = -0.15<br>Depression: SMD = -0.14<br>No statistical significance was found for pain, anxiety, disease activity and for final follow-up in patient education.<br>No statistical significance for Information Only, Counselling, Behavioural Treatment at the beginning and end of the follow-up. |
| 95% Confidence intervals                                              | Disability -0.25 to -0.09<br>Joint counts -0.24 to -0.01<br>PGA -0.49 to -0.07<br>Psychological status -0.27 to -0.04<br>Depression -0.23 to -0.05                                                                                                                                                                                                                                                     |
| P value                                                               | Disability <0.005<br>Joint counts 0.03<br>PGA 0.008<br>Psychological status 0.01<br>Depression 0.004                                                                                                                                                                                                                                                                                                   |
| Follow-up                                                             | 3-14 months                                                                                                                                                                                                                                                                                                                                                                                            |
| Conclusions                                                           | Patient education as provided in the studies reviewed here had small short-term effects on disability, joint counts, patient global assessment, psychological status and depression. There was no evidence of long-term benefits in adults with RA.                                                                                                                                                    |

**Randomised controlled trials**

| <b>Barlow et al., 1998 &amp; Barlow et al., 1997</b>                  |                                                                                                                                                                                                                                                                                                                                                              |
|-----------------------------------------------------------------------|--------------------------------------------------------------------------------------------------------------------------------------------------------------------------------------------------------------------------------------------------------------------------------------------------------------------------------------------------------------|
| Participants characteristics (number, age, disease criteria, details) | RA patients (n=108)<br>80% woman<br>≈ 60 years<br>≈ Disease duration 12 years                                                                                                                                                                                                                                                                                |
| Intervention(s)                                                       | Patient education RA leaflets                                                                                                                                                                                                                                                                                                                                |
| Intervention(s) characteristics                                       | The 'Rheumatoid Arthritis' leaflet used was one of a range of leaflets produced by the Arthritis & Rheumatism Council.                                                                                                                                                                                                                                       |
| Professional that promoted the interventions                          | Doctors or nurse practitioners                                                                                                                                                                                                                                                                                                                               |
| Intervention(s) setting                                               | Hospital                                                                                                                                                                                                                                                                                                                                                     |
| Control                                                               | Patients read a leaflet (other than the ARC leaflet)                                                                                                                                                                                                                                                                                                         |
| Outcomes of interest (types and measuring instruments)                | Knowledge Scale based on the content of the ARC 'Rheumatoid Arthritis' leaflet, modified Health Assessment Questionnaire (HAQ), pain and fatigue visual analogue scales (VAS), the Hospital Anxiety and Depression Scale (HADS), the Arthritis Self-Efficacy: Pain (ASE: Pain) and the Arthritis Self-Efficacy: Other Symptoms (ASE: Other Symptoms) scales. |
| Methods of analysis                                                   | Correlational analysis                                                                                                                                                                                                                                                                                                                                       |
| Effect size                                                           | Not stated                                                                                                                                                                                                                                                                                                                                                   |
| 95% Confidence inter.                                                 | Not stated                                                                                                                                                                                                                                                                                                                                                   |
| P value                                                               | Increase in knowledge (p< 0.005)<br>Decrease in pain (p=0.01) and in depression (p=0.05).<br><br>At follow-up there are no differences.                                                                                                                                                                                                                      |
| Follow-up                                                             | 3 weeks to 6 months                                                                                                                                                                                                                                                                                                                                          |
| Conclusions                                                           | Patient education leaflets can be an effective means of increasing knowledge amongst patients with RA and appear to generate a sense of reassurance. Moreover, change in knowledge can be maintained over periods of months rather than weeks.                                                                                                               |

| <b>Barsky et al., 2010</b>                                            |                                                                                                                                                                                                                                                                                                                                                                                                                                                                                |
|-----------------------------------------------------------------------|--------------------------------------------------------------------------------------------------------------------------------------------------------------------------------------------------------------------------------------------------------------------------------------------------------------------------------------------------------------------------------------------------------------------------------------------------------------------------------|
| Participants characteristics (number, age, disease criteria, details) | RA patients (n=168)<br>≈ 86% female<br>≈ 53 years<br>≈ Disease duration 13 years<br>ACR criteria                                                                                                                                                                                                                                                                                                                                                                               |
| Intervention(s)                                                       | Cognitive-behaviour therapy (CBT), relaxation response training (RR), or arthritis education                                                                                                                                                                                                                                                                                                                                                                                   |
| Intervention(s) characteristics                                       | The CBT consisted of 12 sessions of 60 to 75-minutes. It was a slightly modified and shortened version of the treatment program of Bradley and co-workers. Techniques taught included problem-solving and goal setting, relabelling and reframing of symptoms, enhanced awareness of pain behaviours, activity pacing, and distraction and attention refocusing. Homework was given at the end of each session and reviewed at the beginning of the following session.         |
| Professional that promoted the interventions                          | Not stated                                                                                                                                                                                                                                                                                                                                                                                                                                                                     |
| Intervention(s) setting                                               | Hospital                                                                                                                                                                                                                                                                                                                                                                                                                                                                       |
| Control                                                               | Arthritis education                                                                                                                                                                                                                                                                                                                                                                                                                                                            |
| Outcomes of interest (types and measuring instruments)                | Rheumatoid Arthritis Symptom Questionnaire (RASQ), Grip strength, Walking time, Rand Mental Health Inventory, Arthritis Impact Measurement Scale (AIMS-2)                                                                                                                                                                                                                                                                                                                      |
| Methods of analysis                                                   | Correlational analysis                                                                                                                                                                                                                                                                                                                                                                                                                                                         |
| Effect size                                                           | Effect sizes ranged between 0.26 and 0.35.                                                                                                                                                                                                                                                                                                                                                                                                                                     |
| 95% Confidence inter.                                                 | Not stated                                                                                                                                                                                                                                                                                                                                                                                                                                                                     |
| P value                                                               | Pain improved significantly at 12 months in the RR and AE groups and showed a nonsignificant positive trend with CBT. Other RA symptoms improved significantly with CBT and AE and showed a nonsignificant trend with RR.<br>There were no significant differences in the outcomes across the 3 treatment groups. When the results for all 3 groups were aggregated, significant benefits were found for pain, other RA symptoms, self-care activities, and social activities. |
| Follow-up                                                             | 6 and 12 months                                                                                                                                                                                                                                                                                                                                                                                                                                                                |
| Conclusions                                                           | These 3 psychosocial treatments were beneficial, with treatment effect sizes in the small to moderate range. The effects appeared immediately after treatment and were generally sustained at long-term follow-up. These benefits were achieved over and above those resulting from medical management. These treatments constitute an effective augmentation to standard medical therapy for RA patients.                                                                     |



| <b>Basler et al., 1991</b>                                            |                                                                                                                                                                                                                                                                                                                                                                                                                                                                                                                                                                        |                   |              |           |           |                 |                 |                 |                 |                 |                 |              |              |                                    |                                    |                         |                         |
|-----------------------------------------------------------------------|------------------------------------------------------------------------------------------------------------------------------------------------------------------------------------------------------------------------------------------------------------------------------------------------------------------------------------------------------------------------------------------------------------------------------------------------------------------------------------------------------------------------------------------------------------------------|-------------------|--------------|-----------|-----------|-----------------|-----------------|-----------------|-----------------|-----------------|-----------------|--------------|--------------|------------------------------------|------------------------------------|-------------------------|-------------------------|
| Participants characteristics (number, age, disease criteria, details) | Patients with ankylosing spondylitis (n=39)<br>56% men<br>≈ 45 years                                                                                                                                                                                                                                                                                                                                                                                                                                                                                                   |                   |              |           |           |                 |                 |                 |                 |                 |                 |              |              |                                    |                                    |                         |                         |
| Intervention(s)                                                       | Cognitive-behavioural therapy                                                                                                                                                                                                                                                                                                                                                                                                                                                                                                                                          |                   |              |           |           |                 |                 |                 |                 |                 |                 |              |              |                                    |                                    |                         |                         |
| Intervention(s) characteristics                                       | Training in progressive muscle relaxation, cognitive restructuring, attention related techniques, and pleasant activity scheduling.                                                                                                                                                                                                                                                                                                                                                                                                                                    |                   |              |           |           |                 |                 |                 |                 |                 |                 |              |              |                                    |                                    |                         |                         |
| Professional that promoted the interventions                          | Not stated                                                                                                                                                                                                                                                                                                                                                                                                                                                                                                                                                             |                   |              |           |           |                 |                 |                 |                 |                 |                 |              |              |                                    |                                    |                         |                         |
| Intervention(s) setting                                               | Self-help organization                                                                                                                                                                                                                                                                                                                                                                                                                                                                                                                                                 |                   |              |           |           |                 |                 |                 |                 |                 |                 |              |              |                                    |                                    |                         |                         |
| Control                                                               | Waiting-list controls                                                                                                                                                                                                                                                                                                                                                                                                                                                                                                                                                  |                   |              |           |           |                 |                 |                 |                 |                 |                 |              |              |                                    |                                    |                         |                         |
| Outcomes of interest (types and measuring instruments)                | Pain<br>Impairment<br>Daily mood<br>Depression<br>Anxiety<br>Psychophysiological complains<br>Sleep disturbances                                                                                                                                                                                                                                                                                                                                                                                                                                                       |                   |              |           |           |                 |                 |                 |                 |                 |                 |              |              |                                    |                                    |                         |                         |
| Methods of analysis                                                   | Correlational analysis                                                                                                                                                                                                                                                                                                                                                                                                                                                                                                                                                 |                   |              |           |           |                 |                 |                 |                 |                 |                 |              |              |                                    |                                    |                         |                         |
| Effect size                                                           | <table border="0"> <tr> <td>At post-treatment</td> <td>At follow-up</td> </tr> <tr> <td>Pain 0.06</td> <td>Pain 0.07</td> </tr> <tr> <td>Impairment 0.07</td> <td>Impairment 0.13</td> </tr> <tr> <td>Daily mood 0.07</td> <td>Daily mood 0.01</td> </tr> <tr> <td>Depression 0.43</td> <td>Depression 0.44</td> </tr> <tr> <td>Anxiety 0.35</td> <td>Anxiety 0.60</td> </tr> <tr> <td>Psychophysiological complains 0.75</td> <td>Psychophysiological complains 0.76</td> </tr> <tr> <td>Sleep disturbances 0.41</td> <td>Sleep disturbances 0.62</td> </tr> </table> | At post-treatment | At follow-up | Pain 0.06 | Pain 0.07 | Impairment 0.07 | Impairment 0.13 | Daily mood 0.07 | Daily mood 0.01 | Depression 0.43 | Depression 0.44 | Anxiety 0.35 | Anxiety 0.60 | Psychophysiological complains 0.75 | Psychophysiological complains 0.76 | Sleep disturbances 0.41 | Sleep disturbances 0.62 |
| At post-treatment                                                     | At follow-up                                                                                                                                                                                                                                                                                                                                                                                                                                                                                                                                                           |                   |              |           |           |                 |                 |                 |                 |                 |                 |              |              |                                    |                                    |                         |                         |
| Pain 0.06                                                             | Pain 0.07                                                                                                                                                                                                                                                                                                                                                                                                                                                                                                                                                              |                   |              |           |           |                 |                 |                 |                 |                 |                 |              |              |                                    |                                    |                         |                         |
| Impairment 0.07                                                       | Impairment 0.13                                                                                                                                                                                                                                                                                                                                                                                                                                                                                                                                                        |                   |              |           |           |                 |                 |                 |                 |                 |                 |              |              |                                    |                                    |                         |                         |
| Daily mood 0.07                                                       | Daily mood 0.01                                                                                                                                                                                                                                                                                                                                                                                                                                                                                                                                                        |                   |              |           |           |                 |                 |                 |                 |                 |                 |              |              |                                    |                                    |                         |                         |
| Depression 0.43                                                       | Depression 0.44                                                                                                                                                                                                                                                                                                                                                                                                                                                                                                                                                        |                   |              |           |           |                 |                 |                 |                 |                 |                 |              |              |                                    |                                    |                         |                         |
| Anxiety 0.35                                                          | Anxiety 0.60                                                                                                                                                                                                                                                                                                                                                                                                                                                                                                                                                           |                   |              |           |           |                 |                 |                 |                 |                 |                 |              |              |                                    |                                    |                         |                         |
| Psychophysiological complains 0.75                                    | Psychophysiological complains 0.76                                                                                                                                                                                                                                                                                                                                                                                                                                                                                                                                     |                   |              |           |           |                 |                 |                 |                 |                 |                 |              |              |                                    |                                    |                         |                         |
| Sleep disturbances 0.41                                               | Sleep disturbances 0.62                                                                                                                                                                                                                                                                                                                                                                                                                                                                                                                                                |                   |              |           |           |                 |                 |                 |                 |                 |                 |              |              |                                    |                                    |                         |                         |
| 95% Confidence inter.                                                 | Not stated                                                                                                                                                                                                                                                                                                                                                                                                                                                                                                                                                             |                   |              |           |           |                 |                 |                 |                 |                 |                 |              |              |                                    |                                    |                         |                         |
| P value                                                               | Not stated                                                                                                                                                                                                                                                                                                                                                                                                                                                                                                                                                             |                   |              |           |           |                 |                 |                 |                 |                 |                 |              |              |                                    |                                    |                         |                         |
| Follow-up                                                             | 6 months                                                                                                                                                                                                                                                                                                                                                                                                                                                                                                                                                               |                   |              |           |           |                 |                 |                 |                 |                 |                 |              |              |                                    |                                    |                         |                         |
| Conclusions                                                           | Reductions of pain intensity, anxiety and psychophysiological symptoms were maintained at 12-month follow-up. Although pain reduction was statistically significant, it did not exceed 14% in pain dairy. The more important aspect of the treatment appears to be emotional stabilization and increased feelings of well-being.                                                                                                                                                                                                                                       |                   |              |           |           |                 |                 |                 |                 |                 |                 |              |              |                                    |                                    |                         |                         |

| <b>El Miedany et al., 2012</b>                                        |                                                                                                                                                                                                                                                                                                                                                                                                                                                                                                                               |
|-----------------------------------------------------------------------|-------------------------------------------------------------------------------------------------------------------------------------------------------------------------------------------------------------------------------------------------------------------------------------------------------------------------------------------------------------------------------------------------------------------------------------------------------------------------------------------------------------------------------|
| Participants characteristics (number, age, disease criteria, details) | RA patients (n=147)<br>≈ 71.6% female<br>≈ 53 years<br>≈ Disease duration 11 years<br>ACR criteria                                                                                                                                                                                                                                                                                                                                                                                                                            |
| Intervention(s)                                                       | Arthritis education and self-management                                                                                                                                                                                                                                                                                                                                                                                                                                                                                       |
| Intervention(s) characteristics                                       | Patients were encouraged to discuss their problems and set their own goals. They were also encouraged to view the scores recorded of their former self-reported outcome measures as well as to discuss the changes in their disease activity parameters, co-morbidity risks, functional disability, and quality of life. The patients were taught what to anticipate or what was likely to happen and guided with the skills needed for self-care and decision making regarding the next step in the joint fitness programme. |
| Professional that promoted the interventions                          | Rheumatologist                                                                                                                                                                                                                                                                                                                                                                                                                                                                                                                |
| Intervention(s) setting                                               | Not stated                                                                                                                                                                                                                                                                                                                                                                                                                                                                                                                    |
| Control                                                               | Standard management                                                                                                                                                                                                                                                                                                                                                                                                                                                                                                           |
| Outcomes of interest (types and measuring instruments)                | Patients' adherence to their medications, disease activity score (DAS-28) and PROMs domains: pain score, patient global assessment, functional disability, quality of life and self-helplessness.                                                                                                                                                                                                                                                                                                                             |
| Methods of analysis                                                   | Correlational analysis                                                                                                                                                                                                                                                                                                                                                                                                                                                                                                        |
| Effect size                                                           | At the 18-month follow-up, both the self-management and cognitive behavioural therapy intervention demonstrated improvement for disease activity (effect size 1.4 and 1.2, respectively).                                                                                                                                                                                                                                                                                                                                     |
| 95% Confidence inter.                                                 | Not stated                                                                                                                                                                                                                                                                                                                                                                                                                                                                                                                    |
| P value                                                               | The integration of patient education and PROMs led to a significant greater reduction of disease activity parameters, DAS-28 score, as well as improvement of the patients' adherence to therapy (p<0.01). The improvement of disease activity parameters were associated with the improvement in functional disability and quality of life scores.                                                                                                                                                                           |
| Follow-up                                                             | 18 months                                                                                                                                                                                                                                                                                                                                                                                                                                                                                                                     |
| Conclusions                                                           | The integration of patient education and PROMs succeeded in improving self-perceived health as well as disease activity. The patient education for patients with inflammatory arthritis is feasible in the standard clinical practice.                                                                                                                                                                                                                                                                                        |

| <b>Evers et al., 2002</b>                                             |                                                                                                                                                                                                                                                                                                                                                                                                                                                                                                                                                                                                                                                                                                                                                                                                                                                                                                                                                                                                                                                                                                                                                                                                                                                                                                                                                                                                                                                                                                                                                                                                                 |
|-----------------------------------------------------------------------|-----------------------------------------------------------------------------------------------------------------------------------------------------------------------------------------------------------------------------------------------------------------------------------------------------------------------------------------------------------------------------------------------------------------------------------------------------------------------------------------------------------------------------------------------------------------------------------------------------------------------------------------------------------------------------------------------------------------------------------------------------------------------------------------------------------------------------------------------------------------------------------------------------------------------------------------------------------------------------------------------------------------------------------------------------------------------------------------------------------------------------------------------------------------------------------------------------------------------------------------------------------------------------------------------------------------------------------------------------------------------------------------------------------------------------------------------------------------------------------------------------------------------------------------------------------------------------------------------------------------|
| Participants characteristics (number, age, disease criteria, details) | Early RA patients (n=59)<br>≈ 71 % Female<br>≈ 53.5 years<br>≈ Disease duration 3.1 years<br>ACR Criteria                                                                                                                                                                                                                                                                                                                                                                                                                                                                                                                                                                                                                                                                                                                                                                                                                                                                                                                                                                                                                                                                                                                                                                                                                                                                                                                                                                                                                                                                                                       |
| Intervention(s)                                                       | Cognitive-behavioural treatment                                                                                                                                                                                                                                                                                                                                                                                                                                                                                                                                                                                                                                                                                                                                                                                                                                                                                                                                                                                                                                                                                                                                                                                                                                                                                                                                                                                                                                                                                                                                                                                 |
| Intervention(s) characteristics                                       | The treatment modules were developed from standardized CBT protocols.<br>The pain and function disability module consisted of progressive relaxation, attention diversion, stimulation of physical exercising in daily life in the face of the current physical condition, activity pacing, problem-solving, adjustment of goal-setting to the current physical condition, identification of pain-provoking cues in daily life, and cognitive restructuring of dysfunctional pain cognitions.<br>The fatigue module included activity-pacing, adjustment of goal setting to the current physical condition, setting priorities and structured planning of daily activities and time off, and cognitive restructuring of activity demands.<br>The negative mood module consisted of problem-solving, cognitive restructuring of depressogenic and anxious cognitions, identification of stress-provoking cues in daily life, stimulating pleasurable activities and restructuring of goal-setting in the face of the current physical condition, emotional processing of the changes RA has brought about in daily life and finding benefits.<br>The social module finally included identification of social stress provoking cues in daily life, cognitive restructuring of social anxious cognitions, stimulating social activities in the face of the current physical condition, and social skills training including help-seeking behaviour and communication about RA.<br>In all treatment modules, the final booster session dealt with relapse prevention and further improvement of the attained goals. |
| Professional that promoted the interventions                          | Two therapists trained in the treatment modules and supervised by a cognitive-behaviour supervisor.                                                                                                                                                                                                                                                                                                                                                                                                                                                                                                                                                                                                                                                                                                                                                                                                                                                                                                                                                                                                                                                                                                                                                                                                                                                                                                                                                                                                                                                                                                             |
| Intervention(s) setting                                               | Not stated                                                                                                                                                                                                                                                                                                                                                                                                                                                                                                                                                                                                                                                                                                                                                                                                                                                                                                                                                                                                                                                                                                                                                                                                                                                                                                                                                                                                                                                                                                                                                                                                      |
| Control                                                               | Standard care                                                                                                                                                                                                                                                                                                                                                                                                                                                                                                                                                                                                                                                                                                                                                                                                                                                                                                                                                                                                                                                                                                                                                                                                                                                                                                                                                                                                                                                                                                                                                                                                   |
| Outcomes of interest (types and measuring instruments)                | Disease activity - DAS28_ESR<br>Functional disability - Mobility and Self-care scales of the Impact of Rheumatic Diseases on General Health and Lifestyle (IRGL)<br>Pain - IRGL Pain scale<br>Fatigue - Fatigue scale (eight items) of the Checklist Individual Strength<br>Psychological functioning - IRGL<br>Anxiety and Negative Mood scales                                                                                                                                                                                                                                                                                                                                                                                                                                                                                                                                                                                                                                                                                                                                                                                                                                                                                                                                                                                                                                                                                                                                                                                                                                                                |
| Methods of analysis                                                   | Chi-square analyses for categorical variables and Student's t-test for continuous variables<br>Multivariate analyses                                                                                                                                                                                                                                                                                                                                                                                                                                                                                                                                                                                                                                                                                                                                                                                                                                                                                                                                                                                                                                                                                                                                                                                                                                                                                                                                                                                                                                                                                            |
| Effect size                                                           | Effect sizes were 0.55 and 0.48 for fatigue and 0.51 and 0.55 for depression at post-treatment and follow-up assessment, respectively.<br>In addition, small to medium effects were found for negative mood, anxiety and perceived support at post-treatment and follow-up assessment (0.44 and 0.43 for negative mood, 0.57 and 0.28 for anxiety, and 0.16 and 0.38 for perceived support at post-treatment and follow-up assessment, respectively)                                                                                                                                                                                                                                                                                                                                                                                                                                                                                                                                                                                                                                                                                                                                                                                                                                                                                                                                                                                                                                                                                                                                                            |
| 95% Confidence Inter.                                                 | Not stated                                                                                                                                                                                                                                                                                                                                                                                                                                                                                                                                                                                                                                                                                                                                                                                                                                                                                                                                                                                                                                                                                                                                                                                                                                                                                                                                                                                                                                                                                                                                                                                                      |
| P value                                                               | Beneficial effects of CBT on physical, psychological and social functioning. Specifically, fatigue and depression were significantly reduced at post-treatment and at the 6-month follow-up in the CBT condition in comparison to the control condition, while perceived support increased at follow-up assessment. In addition, helplessness decreased at post-treatment and follow-up assessment, active coping with stress increased at post-treatment, and compliance with medication increased at follow-up assessment in the CBT condition in comparison to the control condition.                                                                                                                                                                                                                                                                                                                                                                                                                                                                                                                                                                                                                                                                                                                                                                                                                                                                                                                                                                                                                        |
| Follow-up                                                             | 6 months                                                                                                                                                                                                                                                                                                                                                                                                                                                                                                                                                                                                                                                                                                                                                                                                                                                                                                                                                                                                                                                                                                                                                                                                                                                                                                                                                                                                                                                                                                                                                                                                        |
| Conclusions                                                           | Results indicate the effectiveness of tailor-made CBT for patients at risk in relatively early RA, and supply preliminary support for the idea that customizing treatments to patient characteristics may be a way to optimize CBT effectiveness in RA patients                                                                                                                                                                                                                                                                                                                                                                                                                                                                                                                                                                                                                                                                                                                                                                                                                                                                                                                                                                                                                                                                                                                                                                                                                                                                                                                                                 |

| <b>Freeman et al., 2002</b>                                           |                                                                                                                                                                                                                                                                                                                                                                                                                                                                                          |
|-----------------------------------------------------------------------|------------------------------------------------------------------------------------------------------------------------------------------------------------------------------------------------------------------------------------------------------------------------------------------------------------------------------------------------------------------------------------------------------------------------------------------------------------------------------------------|
| Participants characteristics (number, age, disease criteria, details) | Early RA patients (n=54)<br>≈ female not stated<br>≈ age not stated<br>≈ Disease duration 4.5 months<br>ACR Criteria                                                                                                                                                                                                                                                                                                                                                                     |
| Intervention(s)                                                       | A program with cognitive-behavioural arthritis education                                                                                                                                                                                                                                                                                                                                                                                                                                 |
| Intervention(s) characteristics                                       | The cognitive-behavioural arthritis education programme used the health belief model and theory of self-efficacy as a theoretical framework. Participants were given accurate information regarding disease pathology and treatment with emphasis on prevention of joint pain, joint deformity and loss of joint function followed by reassurance that treatment could be effective                                                                                                      |
| Professional that promoted the interventions                          | Not stated                                                                                                                                                                                                                                                                                                                                                                                                                                                                               |
| Intervention(s) setting                                               | Clinics                                                                                                                                                                                                                                                                                                                                                                                                                                                                                  |
| Control                                                               | Standard arthritis education programme                                                                                                                                                                                                                                                                                                                                                                                                                                                   |
| Outcomes of interest (types and measuring instruments)                | Physical Function Subscale of the Arthritis Impact Measurement Scale Two (AIMS2)<br>Secondary outcome measures included: ESR, duration of early morning stiffness (minutes) and DAS28                                                                                                                                                                                                                                                                                                    |
| Methods of analysis                                                   | Wilcoxon signed ranks and Friedman ANOVA, Mann-Whitney (U) and chi square tests                                                                                                                                                                                                                                                                                                                                                                                                          |
| Effect size                                                           | Not stated                                                                                                                                                                                                                                                                                                                                                                                                                                                                               |
| 95% Confidence interval                                               | Not stated                                                                                                                                                                                                                                                                                                                                                                                                                                                                               |
| P value                                                               | Baseline analysis revealed that the control group had significantly better levels of functional ability (U = 185; p = 0.009) and lower levels of helplessness (U = 168; p = 0.002) prior to intervention.<br>This difference remained unchanged three months later.<br>Six months following the intervention no significant differences were noted between the groups for any measure of health status.<br>There were no significant changes in health status over time in either group. |
| Follow-up                                                             | 6 months                                                                                                                                                                                                                                                                                                                                                                                                                                                                                 |
| Conclusions                                                           | Attending a cognitive-behavioural arthritis education programme had no significant effect on the health status of individuals newly diagnosed with RA. The move to early use of these programmes should be examined further, with a larger sample size and longer duration of follow-up                                                                                                                                                                                                  |

| <b>Giraudet-Le Quintrec et al., 2007</b>                              |                                                                                                                                                                                                                                                                                                                                                                                                                                                                                                                                                                      |
|-----------------------------------------------------------------------|----------------------------------------------------------------------------------------------------------------------------------------------------------------------------------------------------------------------------------------------------------------------------------------------------------------------------------------------------------------------------------------------------------------------------------------------------------------------------------------------------------------------------------------------------------------------|
| Participants characteristics (number, age, disease criteria, details) | RA patients (n=208)<br>≈ 97% female<br>≈ 55 years<br>≈ Disease duration 13 years<br>ACR Criteria                                                                                                                                                                                                                                                                                                                                                                                                                                                                     |
| Intervention(s)                                                       | The programme employed self-efficacy principles to reduce pain and stress at home, and behavioural modification techniques to change behaviours and improve quality of life by modifying psychological and social contacts                                                                                                                                                                                                                                                                                                                                           |
| Intervention(s) characteristics                                       | The interactive multidisciplinary education program consisted of passive information on the disease, on medical treatment, and on lifestyle advice concerning diet, but also included information on active coping strategies, relaxation, and physical exercise, with the teaching of an exercise program to be followed at home. Sessions were conducted on Thursdays for 6 hours for 8 consecutive weeks.<br>After 6 months, patients attended a 4-hour "booster" session.                                                                                        |
| Professional that promoted the interventions                          | Rheumatologist, rehabilitation specialist, dietician, social assistant, 2 nurses, 2 physiotherapists and 2 occupational therapists                                                                                                                                                                                                                                                                                                                                                                                                                                   |
| Intervention(s) setting                                               | Hospital                                                                                                                                                                                                                                                                                                                                                                                                                                                                                                                                                             |
| Control                                                               | Usual medical care.                                                                                                                                                                                                                                                                                                                                                                                                                                                                                                                                                  |
| Outcomes of interest (types and measuring instruments)                | Functional score – Health Assessment Questionnaire (HAQ)<br>Disease Activity Score (DAS28)<br>Hospital Anxiety and Depression Scale (HADS)<br>Arthritis Helplessness Index (AHI) score for Coping<br>Quality of life using the EMIR<br>Arthritis Impact Measurement Scale (AIMS2)<br>Functional Assessment of Chronic Illness Therapy – Fatigue scale (FACIT-F)<br>Drug compliance<br>Satisfaction with the program<br>Quality of information for each aspect of the program provided by leaflets and/or educational classes                                         |
| Methods of analysis                                                   | Student's t-test                                                                                                                                                                                                                                                                                                                                                                                                                                                                                                                                                     |
| Effect size                                                           | Not stated                                                                                                                                                                                                                                                                                                                                                                                                                                                                                                                                                           |
| 95% Confidence inter.                                                 | Not stated                                                                                                                                                                                                                                                                                                                                                                                                                                                                                                                                                           |
| P value                                                               | After 1 year, no statistically significant difference was observed between the 2 groups in change in HAQ score: $-0.04 \pm 0.46$ (education group) vs $-0.06 \pm 0.47$ (control group) ( $p = 0.79$ ).<br>Statistically significant differences were found in 3 domains, all of which were better for the group attending the education sessions:<br>Patient coping ( $-1.22 \pm 5.55$ vs $-0.22 \pm 3.81$ ; $p = 0.03$ ),<br>Knowledge ( $3.42 \pm 4.73$ vs $0.73 \pm 3.78$ ; $p < 0.0001$ )<br>Satisfaction ( $10.07 \pm 11.70$ vs $5.72 \pm 13.77$ ; $p = 0.02$ ) |
| Follow-up                                                             | 12-month                                                                                                                                                                                                                                                                                                                                                                                                                                                                                                                                                             |
| Conclusions                                                           | Despite improvements in patient coping, knowledge, and satisfaction, the education program was not found to be effective at 1 year.<br>There may have been methodological problems relating to the sensitivity of questionnaires and patient selection, and tailored educational interventions should be considered.                                                                                                                                                                                                                                                 |

| <b>Hammond et al., 2008</b>                                           |                                                                                                                                                                                                                                                                                                                                                                                                                                                                                                                                                                                                                                                                                                                                                                                                                                                                                                                                                            |
|-----------------------------------------------------------------------|------------------------------------------------------------------------------------------------------------------------------------------------------------------------------------------------------------------------------------------------------------------------------------------------------------------------------------------------------------------------------------------------------------------------------------------------------------------------------------------------------------------------------------------------------------------------------------------------------------------------------------------------------------------------------------------------------------------------------------------------------------------------------------------------------------------------------------------------------------------------------------------------------------------------------------------------------------|
| Participants characteristics (number, age, disease criteria, details) | Participants with RA or early IA or PsA (n=167)<br>≈ 64.7% female<br>≈ 55.4 years<br>≈ Disease duration 7.3 years                                                                                                                                                                                                                                                                                                                                                                                                                                                                                                                                                                                                                                                                                                                                                                                                                                          |
| Intervention(s)                                                       | Group modular cognitive-behavioural approach programme (the LMAP)                                                                                                                                                                                                                                                                                                                                                                                                                                                                                                                                                                                                                                                                                                                                                                                                                                                                                          |
| Intervention(s) characteristics                                       | This included 2 modules, each with four 2.5h, and one 2-h review meeting. Module manuals were developed and Arthritis Research Campaign and Arthritis Care booklets were provided. Each meeting included self-monitoring, skills training to follow individually determined home activity and exercise programmes.<br>Meeting 1 discussed RA and PsA, health beliefs, personal impact of arthritis, understanding multiple factors affecting symptoms, attitudes, personal experiences of what helps, self-management methods and motivating for change.<br>Meetings 2-4 focused on applying ergonomic approaches to reduce pain, hand exercises, fatigue management and benefits of splints.<br>In Module 2, discussions focused on participants' exercise beliefs, barriers and problem-solving these.<br>Each module was delivered to facilitate continuing discussion of themes, negotiating home programmes and weekly review of progress with goals. |
| Professional that promoted the interventions                          | One rheumatology OT, one community OT and one rheumatology PT                                                                                                                                                                                                                                                                                                                                                                                                                                                                                                                                                                                                                                                                                                                                                                                                                                                                                              |
| Intervention(s) setting                                               | Not stated                                                                                                                                                                                                                                                                                                                                                                                                                                                                                                                                                                                                                                                                                                                                                                                                                                                                                                                                                 |
| Control                                                               | Group information-focused (or standard) programme                                                                                                                                                                                                                                                                                                                                                                                                                                                                                                                                                                                                                                                                                                                                                                                                                                                                                                          |
| Outcomes of interest (types and measuring instruments)                | Physical status – HAQ<br>Psychological status: the RA Self-efficacy (RASE) Scale; Arthritis Self-efficacy Scale (ASES)<br>Self-management - Arthritis Stages of Change Questionnaire.<br>Health care use - self-reported number of visits to physicians during the last 6 months; current medication                                                                                                                                                                                                                                                                                                                                                                                                                                                                                                                                                                                                                                                       |
| Methods of analysis                                                   | $\chi^2$ or unpaired t-tests as appropriate                                                                                                                                                                                                                                                                                                                                                                                                                                                                                                                                                                                                                                                                                                                                                                                                                                                                                                                |
| Effect size                                                           | Not stated                                                                                                                                                                                                                                                                                                                                                                                                                                                                                                                                                                                                                                                                                                                                                                                                                                                                                                                                                 |
| 95% Confidence inter.                                                 | Not stated                                                                                                                                                                                                                                                                                                                                                                                                                                                                                                                                                                                                                                                                                                                                                                                                                                                                                                                                                 |
| P value                                                               | At 6 months, the behavioural group had better pain (P.0.01), fatigue (P.0.01), functional ability (P.0.05) and self-efficacy (P.0.01) scores and greater use of health behaviours. At 12 months, they continued to have better pain (P.0.03), self-efficacy (P.0.001) and psychological status (P.0.0001) scores and greater use of some health behaviours                                                                                                                                                                                                                                                                                                                                                                                                                                                                                                                                                                                                 |
| Follow-up                                                             | 12 months                                                                                                                                                                                                                                                                                                                                                                                                                                                                                                                                                                                                                                                                                                                                                                                                                                                                                                                                                  |
| Conclusions                                                           | Attending a modular behavioural education programme is effective for at least 1 year in enabling people with RA and PsA to reduce pain, improve psychological status and self-manage their condition.                                                                                                                                                                                                                                                                                                                                                                                                                                                                                                                                                                                                                                                                                                                                                      |

| <b>Hewlett et al., 2011</b>                                           |                                                                                                                                                                                                                                                                                                                                                                                                                                                                                                                                                                                                                                                                                                                                                                                                                                   |
|-----------------------------------------------------------------------|-----------------------------------------------------------------------------------------------------------------------------------------------------------------------------------------------------------------------------------------------------------------------------------------------------------------------------------------------------------------------------------------------------------------------------------------------------------------------------------------------------------------------------------------------------------------------------------------------------------------------------------------------------------------------------------------------------------------------------------------------------------------------------------------------------------------------------------|
| Participants characteristics (number, age, disease criteria, details) | RA patients (n=126)<br>≈ 73.2% female<br>≈ 59.2 years<br>≈ Disease duration 14 years<br>ACR Criteria                                                                                                                                                                                                                                                                                                                                                                                                                                                                                                                                                                                                                                                                                                                              |
| Intervention(s)                                                       | Group cognitive behavioural therapy (CBT) for fatigue self-management                                                                                                                                                                                                                                                                                                                                                                                                                                                                                                                                                                                                                                                                                                                                                             |
| Intervention(s) characteristics                                       | 6 *2 h sessions (weeks 1–6), with a 1 h consolidation session (week 14).<br>Topics likely to improve fatigue self-management were included. Thoughts, feelings and behaviours related to fatigue were addressed using Socratic (reflective) questioning and guided discovery to enable patients to work out links themselves.<br>Problem-solving, goal setting, self-monitoring of activity/rest and energy management, aimed to help patients turn cognitive and behavioural changes into improved well-being. Goal setting occupied the second hour of sessions, each clinician taking half the group to help patients set and review personal cognitive or behavioural goals. Programme homogeneity across groups was maintained through standardised topics, tools, metaphors and handouts, delivered by the same clinicians. |
| Professional that promoted the interventions                          | Clinical psychologist and a specialist occupational therapist                                                                                                                                                                                                                                                                                                                                                                                                                                                                                                                                                                                                                                                                                                                                                                     |
| Intervention(s) setting                                               | Hospital                                                                                                                                                                                                                                                                                                                                                                                                                                                                                                                                                                                                                                                                                                                                                                                                                          |
| Control                                                               | Receiving fatigue information alone                                                                                                                                                                                                                                                                                                                                                                                                                                                                                                                                                                                                                                                                                                                                                                                               |
| Outcomes of interest (types and measuring instruments)                | Fatigue - (Multi-dimensional Assessment of Fatigue (MAF); VAS 0–10)<br>Disability - Health Assessment Questionnaire (HAQ, 0–3)<br>Personal Impact - HAQ (0–9)<br>Wider outcomes - RA Quality-of-Life scale (0–30), Hospital Anxiety and Depression Scale (0–21), Arthritis Helplessness Index (5–30), RA Self-Efficacy scale (RASE, 28–140) and a sleep quality question (very good, fairly good, fairly bad, very bad)                                                                                                                                                                                                                                                                                                                                                                                                           |
| Methods of analysis                                                   | Multivariable linear regression models                                                                                                                                                                                                                                                                                                                                                                                                                                                                                                                                                                                                                                                                                                                                                                                            |
| Effect size                                                           | The standardised effect size for MAF was 0.59 (95% CI 0.15 to 1.03) and 0.77 for fatigue impact VAS (95% CI 0.33 to 1.21) in favour of the CBT intervention                                                                                                                                                                                                                                                                                                                                                                                                                                                                                                                                                                                                                                                                       |
| 95% Confidence inter.                                                 | Above                                                                                                                                                                                                                                                                                                                                                                                                                                                                                                                                                                                                                                                                                                                                                                                                                             |
| P value                                                               | At 18 weeks CBT participants reported better scores than control participants for fatigue impact: MAF 28.99 versus 23.99 (adjusted difference -5.48, 95% CI -9.50 to -1.46, p=0.008); VAS 5.99 versus 4.26 (adjusted difference -1.95, 95% CI -2.99 to -0.90, p<0.001).                                                                                                                                                                                                                                                                                                                                                                                                                                                                                                                                                           |
| Follow-up                                                             | 4.5 months                                                                                                                                                                                                                                                                                                                                                                                                                                                                                                                                                                                                                                                                                                                                                                                                                        |
| Conclusions                                                           | Group CBT for fatigue self-management in RA improves fatigue impact, coping and perceived severity, and well-being.                                                                                                                                                                                                                                                                                                                                                                                                                                                                                                                                                                                                                                                                                                               |

| <b>Hill et al., 2001</b>                                              |                                                                                                                                                                                                                                                                                                                                                                                                                                                       |
|-----------------------------------------------------------------------|-------------------------------------------------------------------------------------------------------------------------------------------------------------------------------------------------------------------------------------------------------------------------------------------------------------------------------------------------------------------------------------------------------------------------------------------------------|
| Participants characteristics (number, age, disease criteria, details) | RA patients (n=100)<br>≈ 74% female<br>≈ 62.5 years<br>≈ Disease duration 12.5 years<br>ACR Criteria                                                                                                                                                                                                                                                                                                                                                  |
| Intervention(s)                                                       | Patient education programme (PE) would improve rates of adherence to a slow acting antirheumatic drug and to assess any subsequent effect on patient outcome                                                                                                                                                                                                                                                                                          |
| Intervention(s) characteristics                                       | 30-minute appointment at monthly intervals over a six-month period comprising seven visits. Patients in the intervention cohort received their PE. The programme comprised information about the types of drugs used for RA, the disease process, physical exercise, joint protection, pain control, and coping strategies. Written information, including a DPA drug information leaflet developed specially for the study, was provided as back up. |
| Professional that promoted the interventions                          | Rheumatology nurse practitioner                                                                                                                                                                                                                                                                                                                                                                                                                       |
| Intervention(s) setting                                               | University teaching hospital                                                                                                                                                                                                                                                                                                                                                                                                                          |
| Control                                                               | Standard management                                                                                                                                                                                                                                                                                                                                                                                                                                   |
| Outcomes of interest (types and measuring instruments)                | Adherence - pharmacological marker<br>Clinical assessments—articular index (AI), morning stiffness, and pain score                                                                                                                                                                                                                                                                                                                                    |
| Methods of analysis                                                   | Logistic regression analysis                                                                                                                                                                                                                                                                                                                                                                                                                          |
| Effect size                                                           | Not stated                                                                                                                                                                                                                                                                                                                                                                                                                                            |
| 95% Confidence intervals                                              | Not stated                                                                                                                                                                                                                                                                                                                                                                                                                                            |
| P value                                                               | Education group demonstrate to be significantly more adherent on more occasions than the control group ( $p < 0.05$ ). Patterns of adherence over time showed that at 12 weeks 86% (38/44) of those in the EG compared with 64% (29/45) of the CG remained adherent ( $p = 0.01$ ). These trends continued and by the end of the study 85% (29/34) of the EG compared with 55% (23/42) of the CG were taking their DPA as prescribed.                 |
| Follow-up                                                             | 6 months                                                                                                                                                                                                                                                                                                                                                                                                                                              |
| Conclusions                                                           | Patient Education significantly increased adherence to DPA and its effects persisted over a period of six months. No additional clinical benefit was detected in the EG in comparison with the CG.                                                                                                                                                                                                                                                    |



| <b>Knittle et al., 2013</b>                                           |                                                                                                                                                                                                                                                                                                                                                                                                                                                                                                                                                                                                                                                                                                                                 |
|-----------------------------------------------------------------------|---------------------------------------------------------------------------------------------------------------------------------------------------------------------------------------------------------------------------------------------------------------------------------------------------------------------------------------------------------------------------------------------------------------------------------------------------------------------------------------------------------------------------------------------------------------------------------------------------------------------------------------------------------------------------------------------------------------------------------|
| Participants characteristics (number, age, disease criteria, details) | RA patients (n=78)<br>≈ 67% female<br>≈ 63 years<br>≈ Disease duration not stated<br>ACR Criteria                                                                                                                                                                                                                                                                                                                                                                                                                                                                                                                                                                                                                               |
| Intervention(s)                                                       | Education session plus a motivational interview from a physical therapist and two self-regulation coaching sessions from a rheumatology nurse.                                                                                                                                                                                                                                                                                                                                                                                                                                                                                                                                                                                  |
| Intervention(s) characteristics                                       | In week 1, both control and treatment participants attended a group educational session (3-7 people).<br>In week 2, treated patients received a one-to-one education session of 45 min. Patients weighed the pros and cons of (re-)engaging in PA, and links were made for physically active lifestyle and settling of long-term goals.<br>In weeks 4 and 5, one to one coaching sessions (40-60min) to patients in the treatment group were made to enhance fidelity of intervention delivery, followed the structure of a workbook developed for this study.<br>In weeks 6, 12 and 18, patients in the treatment group received a follow-up phone call to discuss the patient's efforts in self-regulating physical activity. |
| Professional that promoted the interventions                          | Rheumatology nurse<br>Physical therapist                                                                                                                                                                                                                                                                                                                                                                                                                                                                                                                                                                                                                                                                                        |
| Intervention(s) setting                                               | Hospital                                                                                                                                                                                                                                                                                                                                                                                                                                                                                                                                                                                                                                                                                                                        |
| Control                                                               | Control group—which received a group-based patient education session led by a physical therapist                                                                                                                                                                                                                                                                                                                                                                                                                                                                                                                                                                                                                                |
| Outcomes of interest (types and measuring instruments)                | Leisure-time physical activity - Short Questionnaire to Assess Health-Enhancing Physical Activity<br>Self-efficacy for PA - 18-item questionnaire from Bandura<br>Autonomous motivation for PA – three items from the Treatment Self-Regulation Questionnaire<br>Disease activity - Rheumatoid Arthritis Disease Activity Index (RADAI)<br>Functional status - 20-item disability scale of the Health Assessment Questionnaire (HAQ)<br>Depressive symptoms - 6 items from the Brief Symptom Inventory (BSI)<br>Fatigue - 20-item Checklist of Individual Strengths (CIS-20)                                                                                                                                                    |
| Methods of analysis                                                   | Mixed model repeated measures analyses                                                                                                                                                                                                                                                                                                                                                                                                                                                                                                                                                                                                                                                                                          |
| Effect size                                                           | Leisure time PA:<br>Post treatment p =0.29<br>6 months p =0.29                                                                                                                                                                                                                                                                                                                                                                                                                                                                                                                                                                                                                                                                  |
| 95% Confidence intervals                                              | Leisure time PA:<br>64 (-12.2, 140.2) Post treatment<br>84 (-2.9, 170.9) 6 months                                                                                                                                                                                                                                                                                                                                                                                                                                                                                                                                                                                                                                               |
| P value                                                               | Over the 32 weeks of the study, there were significant main effects (group * time) on leisure time PA (F =4.01; p =0.022), days per week with 30 min of PA (F =4.39; p =0.016), total self-efficacy (F =5.18; p =0.001) and autonomous motivation (F =7.16; p =0.008); but not disease activity (F =2.17; p =0.121), functional status (F =0.64; p =0.530), depressive symptoms (F =1.35; p =0.266) or fatigue (F =0.43; p = 0.651).<br>No significant effects were found for disease activity, functional status, depressive symptoms or fatigue.                                                                                                                                                                              |
| Follow-up                                                             | 6 months                                                                                                                                                                                                                                                                                                                                                                                                                                                                                                                                                                                                                                                                                                                        |
| Conclusions                                                           | Combining motivation- and action-focused intervention approaches improved PA-related cognitions and led to improved uptake and maintenance of leisure-time PA                                                                                                                                                                                                                                                                                                                                                                                                                                                                                                                                                                   |

| <b>Lumley et al., 2014</b>                                            |                                                                                                                                                                                                                                                                                                                                                                                                                                                                                                                                                                                                                                                                                                                                                                                                                                                                                                                                                                                                                                                                                                                                                                                                                                                                                                                                                                                                                                                                                                                                                                                                                                                                                                                                                                                                                                                                                                                                                                                                                                                                                                                                                                                                                                                                                                                                                                                                                                                   |
|-----------------------------------------------------------------------|---------------------------------------------------------------------------------------------------------------------------------------------------------------------------------------------------------------------------------------------------------------------------------------------------------------------------------------------------------------------------------------------------------------------------------------------------------------------------------------------------------------------------------------------------------------------------------------------------------------------------------------------------------------------------------------------------------------------------------------------------------------------------------------------------------------------------------------------------------------------------------------------------------------------------------------------------------------------------------------------------------------------------------------------------------------------------------------------------------------------------------------------------------------------------------------------------------------------------------------------------------------------------------------------------------------------------------------------------------------------------------------------------------------------------------------------------------------------------------------------------------------------------------------------------------------------------------------------------------------------------------------------------------------------------------------------------------------------------------------------------------------------------------------------------------------------------------------------------------------------------------------------------------------------------------------------------------------------------------------------------------------------------------------------------------------------------------------------------------------------------------------------------------------------------------------------------------------------------------------------------------------------------------------------------------------------------------------------------------------------------------------------------------------------------------------------------|
| Participants characteristics (number, age, disease criteria, details) | Early RA patients (n=264)<br>≈ 81% female<br>≈ 55 years<br>≈ Disease duration not stated<br>ACR Criteria                                                                                                                                                                                                                                                                                                                                                                                                                                                                                                                                                                                                                                                                                                                                                                                                                                                                                                                                                                                                                                                                                                                                                                                                                                                                                                                                                                                                                                                                                                                                                                                                                                                                                                                                                                                                                                                                                                                                                                                                                                                                                                                                                                                                                                                                                                                                          |
| Intervention(s)                                                       | 3 intervention groups <ul style="list-style-type: none"> <li>• Written emotional disclosure (WED) + coping skills training</li> <li>• WED + control training</li> <li>• Coping skills training (CST) + control writing</li> </ul>                                                                                                                                                                                                                                                                                                                                                                                                                                                                                                                                                                                                                                                                                                                                                                                                                                                                                                                                                                                                                                                                                                                                                                                                                                                                                                                                                                                                                                                                                                                                                                                                                                                                                                                                                                                                                                                                                                                                                                                                                                                                                                                                                                                                                 |
| Intervention(s) characteristics                                       | <p>Patients started their assigned writing condition, which continued for the next week, after which they immediately began their assigned training condition, with eight sessions held at weekly intervals.</p> <p>WED - Session 1, patients were instructed to identify a stressful and to write about their; Session 2, patients were asked to continue writing stressful experience; Session 3, patients were instructed to try to find meaning from their stressful experience and to write about anything they learned from their experience; Session 4, patients were asked to write about how they coped with their stressful experience.</p> <p>WED control - Session 1, patients wrote about how they spent and managed their time during the prior week; Session 2, patients wrote about their eating behaviours during the current day and reviewed their eating over recent days; Session 3, patients wrote about physical activity behaviours during the past week; Session 4, patients detailed their sleep over the past week.</p> <p>CST- Session 1, patients learned progressive muscle relaxation; Session 2, relaxation was reviewed and pleasant activity scheduling was taught; Session 3, assertive communication skills were introduced and the use of applied relaxation in daily life was taught; Session 4, communication skills training was continued and cognitive restructuring introduced; Session 5, cognitive restructuring, was continued and activity-rest cycling was also covered; Session 6, activity-rest cycling was reviewed and distraction skills were taught; Session 7, patients reviewed all of the skills and learned problem solving; Session 8, relapse prevention was addressed.</p> <p>CST Control</p> <p>Session 1 characteristics of RA; Session 2, joint anatomy and physiology, and signs and symptoms of RA; Session 3, diagnosis and prognosis of RA, goals of treatment, overview of all treatments; Session 4, the immune system and RA-specific medications; Session 5, pain assessment, analgesics, and other pain medications; Session 6, complementary and alternative medicine interventions, dietary supplements, nutrition, weight control, exercise; Session 7, surgery, physical modalities, physical and occupational therapy, adaptive devices; and Session 8, shared management of RA, clinical trials for RA, and resources for patients, including Internet skills.</p> |
| Professional that promoted the interventions                          | CST - advanced doctoral students or postdoctoral fellows in clinical psychology<br>CTS control - primarily nurses.                                                                                                                                                                                                                                                                                                                                                                                                                                                                                                                                                                                                                                                                                                                                                                                                                                                                                                                                                                                                                                                                                                                                                                                                                                                                                                                                                                                                                                                                                                                                                                                                                                                                                                                                                                                                                                                                                                                                                                                                                                                                                                                                                                                                                                                                                                                                |
| Intervention(s) setting                                               | Hospital                                                                                                                                                                                                                                                                                                                                                                                                                                                                                                                                                                                                                                                                                                                                                                                                                                                                                                                                                                                                                                                                                                                                                                                                                                                                                                                                                                                                                                                                                                                                                                                                                                                                                                                                                                                                                                                                                                                                                                                                                                                                                                                                                                                                                                                                                                                                                                                                                                          |
| Control                                                               | Control writing + Control training                                                                                                                                                                                                                                                                                                                                                                                                                                                                                                                                                                                                                                                                                                                                                                                                                                                                                                                                                                                                                                                                                                                                                                                                                                                                                                                                                                                                                                                                                                                                                                                                                                                                                                                                                                                                                                                                                                                                                                                                                                                                                                                                                                                                                                                                                                                                                                                                                |
| Outcomes of interest (types and measuring instruments)                | Disease activity – 32 joints + PGA<br>Pain - self-report Arthritis Impact Measurement Scales-2 (AIMS2)<br>Physical disability - AIMS2 subscales<br>Psychological symptoms - AIMS2 subscales<br>Walking speed - 50-foot hallway<br>Inflammatory activity - CRP                                                                                                                                                                                                                                                                                                                                                                                                                                                                                                                                                                                                                                                                                                                                                                                                                                                                                                                                                                                                                                                                                                                                                                                                                                                                                                                                                                                                                                                                                                                                                                                                                                                                                                                                                                                                                                                                                                                                                                                                                                                                                                                                                                                     |
| Methods of analysis                                                   | ANCOVA                                                                                                                                                                                                                                                                                                                                                                                                                                                                                                                                                                                                                                                                                                                                                                                                                                                                                                                                                                                                                                                                                                                                                                                                                                                                                                                                                                                                                                                                                                                                                                                                                                                                                                                                                                                                                                                                                                                                                                                                                                                                                                                                                                                                                                                                                                                                                                                                                                            |
| Effect size                                                           | The benefits of CST are the clearest.<br>The between-group effect sizes of this intervention on these outcomes ranged from 0.23 to 0.37 standard deviations                                                                                                                                                                                                                                                                                                                                                                                                                                                                                                                                                                                                                                                                                                                                                                                                                                                                                                                                                                                                                                                                                                                                                                                                                                                                                                                                                                                                                                                                                                                                                                                                                                                                                                                                                                                                                                                                                                                                                                                                                                                                                                                                                                                                                                                                                       |
| 95% Confidence int.                                                   | Not stated                                                                                                                                                                                                                                                                                                                                                                                                                                                                                                                                                                                                                                                                                                                                                                                                                                                                                                                                                                                                                                                                                                                                                                                                                                                                                                                                                                                                                                                                                                                                                                                                                                                                                                                                                                                                                                                                                                                                                                                                                                                                                                                                                                                                                                                                                                                                                                                                                                        |
| P value                                                               | Hierarchical linear modelling of treatment effects over the follow-up period, and analyses of covariance at each assessment point, revealed no interactions between writing and training; however, both interventions had main effects on outcomes, with small effect sizes. Compared with control training, CST decreased pain and psychological symptoms through 12 months. The effects of WED were mixed: Compared with control writing, WED reduced disease activity and physical disability at 1 month only, but WED had more pain than control writing on 1 of 2 measures at 4 and 12 months                                                                                                                                                                                                                                                                                                                                                                                                                                                                                                                                                                                                                                                                                                                                                                                                                                                                                                                                                                                                                                                                                                                                                                                                                                                                                                                                                                                                                                                                                                                                                                                                                                                                                                                                                                                                                                                |
| Follow-up                                                             | 12 months                                                                                                                                                                                                                                                                                                                                                                                                                                                                                                                                                                                                                                                                                                                                                                                                                                                                                                                                                                                                                                                                                                                                                                                                                                                                                                                                                                                                                                                                                                                                                                                                                                                                                                                                                                                                                                                                                                                                                                                                                                                                                                                                                                                                                                                                                                                                                                                                                                         |
| Conclusions                                                           | The combination of WED and CST does not improve outcomes, perhaps because each intervention has unique effects at different time points. CST improves health status in RA and is recommended for patients, whereas WED has limited benefits and needs strengthening or better targeting to appropriate patients                                                                                                                                                                                                                                                                                                                                                                                                                                                                                                                                                                                                                                                                                                                                                                                                                                                                                                                                                                                                                                                                                                                                                                                                                                                                                                                                                                                                                                                                                                                                                                                                                                                                                                                                                                                                                                                                                                                                                                                                                                                                                                                                   |

| <b>Manning et al., 2014</b>                                           |                                                                                                                                                                                                                                                                                                                                                                                                                                                                                                                                                                                                                                                                                         |
|-----------------------------------------------------------------------|-----------------------------------------------------------------------------------------------------------------------------------------------------------------------------------------------------------------------------------------------------------------------------------------------------------------------------------------------------------------------------------------------------------------------------------------------------------------------------------------------------------------------------------------------------------------------------------------------------------------------------------------------------------------------------------------|
| Participants characteristics (number, age, disease criteria, details) | Early RA patients (n=108)<br>≈ 76% female<br>≈ 55 years<br>≈ Disease duration 1.2 years<br>ACR Criteria                                                                                                                                                                                                                                                                                                                                                                                                                                                                                                                                                                                 |
| Intervention(s)                                                       | A brief, supervised education, self-management, and global upper extremity exercise training (EXTRA) program, supplementing a functional home exercise regimen, aimed at improving global upper extremity disability in people with RA                                                                                                                                                                                                                                                                                                                                                                                                                                                  |
| Intervention(s) characteristics                                       | EXTRA program was refined to comprise 4 supervised group (4–6 participants per group) education, self-management, and global upper extremity exercise training sessions (delivered twice weekly for the first 2 weeks of the intervention) supplementing a functional daily home exercise regimen.<br>The supervised sessions commenced with a 15-minute interactive discussion/seminar designed to increase participants' knowledge of RA and exercise, self-efficacy, and disease self-management, and facilitate uptake and longer-term exercise participation. Behaviour change strategies were integrated into the seminars and reviewed, where necessary, in subsequent sessions. |
| Professional that promoted the interventions                          | Clinical physiotherapist                                                                                                                                                                                                                                                                                                                                                                                                                                                                                                                                                                                                                                                                |
| Intervention(s) setting                                               | Hospital                                                                                                                                                                                                                                                                                                                                                                                                                                                                                                                                                                                                                                                                                |
| Control                                                               | Usual care                                                                                                                                                                                                                                                                                                                                                                                                                                                                                                                                                                                                                                                                              |
| Outcomes of interest (types and measuring instruments)                | Disability - 30-item DASH questionnaire<br>Hand functional ability - Grip Ability Test (GAT)<br>Handgrip strength - hydraulic handgrip Dynamometer<br>Quality of life - 30-item Rheumatoid Arthritis Quality of Life (RAQoL)<br>Confidence - Arthritis Self-Efficacy Scale (ASES)<br>DAS28-ESR<br>Pain - VAS<br>Fatigue - VAS                                                                                                                                                                                                                                                                                                                                                           |
| Methods of analysis                                                   | Full factorial mixed-method analysis of variance<br>Post hoc analyses using dependent t-tests with Bonferroni adjustment for multiple comparisons were conducted                                                                                                                                                                                                                                                                                                                                                                                                                                                                                                                        |
| Effect size                                                           | DASH 12 weeks – 0.50<br>DASH 36 weeks – 0.07                                                                                                                                                                                                                                                                                                                                                                                                                                                                                                                                                                                                                                            |
| 95% Confidence intervals                                              | DASH 12 weeks – 0.50 (0.07-0.93)<br>DASH 36 weeks – 0.07 (-0.35-0.49)                                                                                                                                                                                                                                                                                                                                                                                                                                                                                                                                                                                                                   |
| P value                                                               | At 12 weeks, there was a significant between-group difference, all favouring the EXTRA programme, in the mean change in <ul style="list-style-type: none"> <li>• disability (-6.8 [95% confidence interval (95% CI)-12.6,-1.0]; P =0.022),</li> <li>• function (-3.0 [95% CI -5.0, -0.5]; P=0.011),</li> <li>• non-dominant handgrip strength (31.3N [95% CI 9.8,52.8]; P =0.009),</li> <li>• self-efficacy (10.5 [95% CI 1.6, 19.5]; P=0.021</li> <li>• pain 9.3 [95% CI 0.5, 18.2]; P =0.039 for symptoms), and</li> <li>• disease activity (-0.7 [95% CI -1.4, 0.0]; P =0.047)</li> </ul>                                                                                            |
| Follow-up                                                             | 9 months                                                                                                                                                                                                                                                                                                                                                                                                                                                                                                                                                                                                                                                                                |
| Conclusions                                                           | The EXTRA program improves upper extremity disability, function, handgrip strength, and self-efficacy in people with RA, with no adverse effects on disease activity.                                                                                                                                                                                                                                                                                                                                                                                                                                                                                                                   |

| <b>Niedermann et al., 2011 &amp; Niedermann et al., 2012</b>          |                                                                                                                                                                                                                                                                                                                                                                                                                                                                                                                                                                                                                                                                                                                                                                                                                                                                                                             |
|-----------------------------------------------------------------------|-------------------------------------------------------------------------------------------------------------------------------------------------------------------------------------------------------------------------------------------------------------------------------------------------------------------------------------------------------------------------------------------------------------------------------------------------------------------------------------------------------------------------------------------------------------------------------------------------------------------------------------------------------------------------------------------------------------------------------------------------------------------------------------------------------------------------------------------------------------------------------------------------------------|
| Participants characteristics (number, age, disease criteria, details) | Early RA patients (n=54)<br>≈ 58 years<br>≈ Disease duration 9.3 years<br>ACR Criteria                                                                                                                                                                                                                                                                                                                                                                                                                                                                                                                                                                                                                                                                                                                                                                                                                      |
| Intervention(s)                                                       | Pictorial Representation of Illness and Self Measure (PRISM) is an interactive hands-on-tool, assessing (a) the individual's perceived burden of illness and (b) relevant individual resources                                                                                                                                                                                                                                                                                                                                                                                                                                                                                                                                                                                                                                                                                                              |
| Intervention(s) characteristics                                       | The PRISM-JP education consisted individualized education and is based on the PRISM tasks of social learning and self-management.<br>The programme consists in 4, 45-min sessions within 3 weeks.<br>In session 1, the standard PRISM task was used to assess perceived burden of illness caused by the RA or pain and identify individual goals.<br>In session 2, The PRISM+ task helped to find the most important individual resource. Patients were asked what activities were most important to them.<br>In sessions 3 and 4, the selected resource was evaluated and reinforced.                                                                                                                                                                                                                                                                                                                      |
| Professional that promoted the interventions                          | Occupational therapists                                                                                                                                                                                                                                                                                                                                                                                                                                                                                                                                                                                                                                                                                                                                                                                                                                                                                     |
| Intervention(s) setting                                               | Hospital                                                                                                                                                                                                                                                                                                                                                                                                                                                                                                                                                                                                                                                                                                                                                                                                                                                                                                    |
| Control                                                               | Conventional JP education                                                                                                                                                                                                                                                                                                                                                                                                                                                                                                                                                                                                                                                                                                                                                                                                                                                                                   |
| Outcomes of interest (types and measuring instruments)                | Joint protection behaviour - Joint Protection Behaviour Assessment D-JPBA-S, Psychological status - Arthritis Self-efficacy Scale, German Version (ASES-D); Hospital Anxiety and Depression Scale, German Version, (HADS-D), Hand status - Grip strength using Jamar hand, Dynamometer; hand pain (VAS scale); DAS28, Quality of life - EUROHIS-QUOL 8                                                                                                                                                                                                                                                                                                                                                                                                                                                                                                                                                      |
| Methods of analysis                                                   | Unpaired t-tests for between group comparisons, paired t-tests for within-group comparisons at 3 months and linear regression analysis. Mann-Whitney U-tests and Wilcoxon signed ranks tests were applied for ordinal data to compare between-groups and within-groups, respectively. The relationship between change of primary outcome variable and predictor variables was analysed by linear regression analysis                                                                                                                                                                                                                                                                                                                                                                                                                                                                                        |
| Effect size                                                           | Not stated                                                                                                                                                                                                                                                                                                                                                                                                                                                                                                                                                                                                                                                                                                                                                                                                                                                                                                  |
| 95% Confidence inter.                                                 | Not stated                                                                                                                                                                                                                                                                                                                                                                                                                                                                                                                                                                                                                                                                                                                                                                                                                                                                                                  |
| P value                                                               | At 3 months, the PRISM-JP (n = 26) participants did significantly better compared to the C-JP participants (n = 27) in <ul style="list-style-type: none"> <li>• JP behaviour (p = 0.02 and p = 0.008 when corrected for baseline values),</li> <li>• Arthritis Self-efficacy (ASES, p = 0.015) and</li> <li>• JP self-efficacy (JP-SES, p = 0.047).</li> </ul> Within-group analysis also showed less hand pain (p < 0.001) in PRISM-JP group.<br>At 12 months, the PRISM-JP group (n = 26) demonstrated significantly more JP behaviour at six months (effect size ES = 0.32; p = 0.02) and 12 months (ES = 0.28; p = 0.04) than the C-JP (n = 27).<br>Within-group analysis showed that the JP intervention was successful at six and 12 months in both groups (p < 0.001).<br>At 12 months the PRISM-JP group had better JP self-efficacy (p = 0.02) and grip strength (p = 0.04) compared with baseline |
| Follow-up                                                             | 3 months<br>12 months                                                                                                                                                                                                                                                                                                                                                                                                                                                                                                                                                                                                                                                                                                                                                                                                                                                                                       |
| Conclusions                                                           | At 3 months, PRISM-JP more effectively supported learning of JP methods, with meaningful occupations, resource activation and self-efficacy acting as important mediators.<br>At 12 months, PRISM-JP was more effective than C-JP in terms of long-term JP behaviour at six and 12 months                                                                                                                                                                                                                                                                                                                                                                                                                                                                                                                                                                                                                   |

| <b>Seneca et al., 2015</b>                                            |                                                                                                                                                                                                                                                                                                                                                                                                                                                                                                                                                                                                                                                    |
|-----------------------------------------------------------------------|----------------------------------------------------------------------------------------------------------------------------------------------------------------------------------------------------------------------------------------------------------------------------------------------------------------------------------------------------------------------------------------------------------------------------------------------------------------------------------------------------------------------------------------------------------------------------------------------------------------------------------------------------|
| Participants characteristics (number, age, disease criteria, details) | Early RA patients (n=51)<br>≈ 68% female<br>≈ 58 years<br>≈ Disease duration 1.2 years<br>ACR/EULAR Criteria                                                                                                                                                                                                                                                                                                                                                                                                                                                                                                                                       |
| Intervention(s)                                                       | 12 weeks of exercises partly supervised                                                                                                                                                                                                                                                                                                                                                                                                                                                                                                                                                                                                            |
| Intervention(s) characteristics                                       | Participants underwent six weeks of supervised training with 30 minutes of physical fitness on an exercise bike. Thirty minutes of muscle strength training (legs, shoulders, trunk extensors and flexors). Exercises were repeated three times. Bike training was used as warm-up before strength exercises. The strength exercises were circle training giving a rest period of approximately five minutes between each set. Intensity load was increased at least every two weeks and adjusted to the patients' symptoms. The supervised sessions were held twice a week in groups of 2-4 patients.                                             |
| Professional that promoted the interventions                          | Physiotherapist                                                                                                                                                                                                                                                                                                                                                                                                                                                                                                                                                                                                                                    |
| Intervention(s) setting                                               | Hospital and community                                                                                                                                                                                                                                                                                                                                                                                                                                                                                                                                                                                                                             |
| Control                                                               | Self-administered exercises                                                                                                                                                                                                                                                                                                                                                                                                                                                                                                                                                                                                                        |
| Outcomes of interest (types and measuring instruments)                | Muscle strength - Cybex strengthtraining equipment<br>Physical fitness - submaximal cycle test (Astrand test)<br>Pain – Numerical scale<br>DAS28-CRP<br>Health Assessment Questionnaire (HAQ-DI)<br>The Short Form 36 Health Survey (SF36)<br>Anxiety and fear avoidance in relation to physical activity - Fear Avoidance Belief Questionnaire (FABQ);                                                                                                                                                                                                                                                                                            |
| Methods of analysis                                                   | Spearman's rank correlation analyses                                                                                                                                                                                                                                                                                                                                                                                                                                                                                                                                                                                                               |
| Effect size                                                           | Not stated                                                                                                                                                                                                                                                                                                                                                                                                                                                                                                                                                                                                                                         |
| 95% Confidence inter.                                                 | Not stated                                                                                                                                                                                                                                                                                                                                                                                                                                                                                                                                                                                                                                         |
| P value                                                               | Following the 12 weeks of exercises, patients in the two groups had improved both their muscle strength and their physical fitness. There was a significant difference in Disease Activity Score in 28 joints calculated with C-reactive protein between the two exercise groups, but no significant differences in physical fitness, pain perception, Health Assessment Questionnaire, Short Form 36 health survey questionnaire, Fear-Avoidance Beliefs Questionnaire, or in muscle strength, except from a significant difference in trunk extensors.<br>The dropout was 40% in the supervised group versus 20% in the self-administered group. |
| Follow-up                                                             | 3 months                                                                                                                                                                                                                                                                                                                                                                                                                                                                                                                                                                                                                                           |
| Conclusions                                                           | The partly supervised exercise programme with follow-up after 12 weeks does not seem to be more effective than the self-administered exercise programme.                                                                                                                                                                                                                                                                                                                                                                                                                                                                                           |

| <b>Shearn et al., 1985</b>                             |                                                                                                                                                                                                                                                                                                                                                                                                                          |
|--------------------------------------------------------|--------------------------------------------------------------------------------------------------------------------------------------------------------------------------------------------------------------------------------------------------------------------------------------------------------------------------------------------------------------------------------------------------------------------------|
| Participants characteristics                           | RA patients (n=81)<br>≈ 74% female<br>≈ 56 years<br>≈ Disease duration 10 years<br>Criteria – ARA                                                                                                                                                                                                                                                                                                                        |
| Intervention(s)                                        | Program to assess the value of stress management and mutual support groups on the morbidity and psychologic health of patients with rheumatoid arthritis.                                                                                                                                                                                                                                                                |
| Intervention(s) characteristics                        | Groups met for 10 weekly 90-minute sessions. The aims of stress management were to help the patient identify sources of stress as well as to learn relaxation techniques and strategies for coping.<br>In mutual support groups the aim was to enhance self-responsibility, exchange information, build relationships, and attempt to decrease social isolation.                                                         |
| Professional that promoted the interventions           | Psychologist                                                                                                                                                                                                                                                                                                                                                                                                             |
| Intervention(s) setting                                | Not stated - Kaiser Permanente Medical Center                                                                                                                                                                                                                                                                                                                                                                            |
| Control                                                | Standard care                                                                                                                                                                                                                                                                                                                                                                                                            |
| Outcomes of interest (types and measuring instruments) | Pain<br>Duration of morning stiffness<br>ESR<br>Grip strength<br>Walking speed<br>Number of tender joints<br>Disability<br>Life satisfaction<br>Depression – CES- D Scale                                                                                                                                                                                                                                                |
| Methods of analysis                                    | T test; Analyses of covariance was performed to adjust for the effects of age, sex, disease duration, and pre-test scores on change in the outcome measures.                                                                                                                                                                                                                                                             |
| Effect size                                            | Not stated                                                                                                                                                                                                                                                                                                                                                                                                               |
| 95% Confidence inter.                                  | Not stated                                                                                                                                                                                                                                                                                                                                                                                                               |
| P value                                                | Of all these physiologic components, only tender joints showed significant improvement at four months ( $p < 0.05$ ).<br>The psychologic measures of depression and life satisfaction showed no significant change for either intervention group or for the combined intervention groups compared with the control group.<br>No outcome measure showed a significant change from those recorded before any intervention. |
| Follow-up                                              | 4 months                                                                                                                                                                                                                                                                                                                                                                                                                 |
| Conclusions                                            | Patients in the Intervention groups showed greater improvement in joint tenderness than in the control patients but did not differ significantly from the patients in the control group in any of the other outcome measures.                                                                                                                                                                                            |

| <b>Shigaki et al., 2013</b>                            |                                                                                                                                                                                                                                                                                                                                                                                                                                                                                                                                                                                                                                  |
|--------------------------------------------------------|----------------------------------------------------------------------------------------------------------------------------------------------------------------------------------------------------------------------------------------------------------------------------------------------------------------------------------------------------------------------------------------------------------------------------------------------------------------------------------------------------------------------------------------------------------------------------------------------------------------------------------|
| Participants characteristics                           | RA patients (n=168)<br>≈ 92.5% female<br>≈ 50 years<br>≈ Disease duration 8 years<br>Criteria – not stated                                                                                                                                                                                                                                                                                                                                                                                                                                                                                                                       |
| Intervention(s)                                        | Self-management program in rheumatoid arthritis (RA) using an online, cognitive-behavioral, self-management group program (RAHelp), with weekly telephone support                                                                                                                                                                                                                                                                                                                                                                                                                                                                |
| Intervention(s) characteristics                        | A secure web site (RAHelp.org) to provide a 10-week program with weekly educational modules. A “homework” journal was provided with self-monitoring tools for members to track pain and stress. Text boxes were also provided, where pleasant events and weekly challenges could be described. In addition to online features, each member was provided with 1:1 leader support through weekly phone contacts, typically lasting between 15 and 30 minutes. Members had access to several “community” features and activities. Each member created a structured profile and selected an avatar, made available to other members. |
| Professional that promoted the interventions           | Clinicians                                                                                                                                                                                                                                                                                                                                                                                                                                                                                                                                                                                                                       |
| Intervention(s) setting                                | Not stated - Internet                                                                                                                                                                                                                                                                                                                                                                                                                                                                                                                                                                                                            |
| Control                                                | Waiting list control group                                                                                                                                                                                                                                                                                                                                                                                                                                                                                                                                                                                                       |
| Outcomes of interest (types and measuring instruments) | Arthritis Impact Measurement Scales 2 (AIMS2)<br>Arthritis Self-Efficacy Scale (ASES)<br>Center for Epidemiologic Studies Depression Scale (CES-D)<br>Quality of Life Scale (QLS)<br>Rapid Assessment of Disease Activity in Rheumatology (RADAR)<br>Social Provisions Scale (SPS)<br>University of California, Los Angeles Loneliness Scale, version 3 (LS-3).                                                                                                                                                                                                                                                                  |
| Methods of analysis                                    | Wilcoxon rank sum test<br>Nonparametric analysis of covariance                                                                                                                                                                                                                                                                                                                                                                                                                                                                                                                                                                   |
| Effect size                                            | Effect sizes remained large for self-efficacy and moderate for quality of life.                                                                                                                                                                                                                                                                                                                                                                                                                                                                                                                                                  |
| 95% Confidence inter.                                  | Not stated                                                                                                                                                                                                                                                                                                                                                                                                                                                                                                                                                                                                                       |
| P value                                                | Group differences with large and moderate effect sizes (ES) were found immediately postintervention for self-efficacy (ASES; ES 0.92, P < 0.00001) and quality of life (QLS; ES 0.66, P < 0.003), respectively.<br>At 9 months postintervention, differences in self-efficacy (ASES; ES 0.92, P < 0.00001) and quality of life (QLS; ES 0.71, P < 0.004) remained robust.                                                                                                                                                                                                                                                        |
| Follow-up                                              | 9 months                                                                                                                                                                                                                                                                                                                                                                                                                                                                                                                                                                                                                         |
| Conclusions                                            | RAHelp appears to have beneficial effects in terms of self-efficacy and quality of life among individuals with RA who are willing to use an online service format.                                                                                                                                                                                                                                                                                                                                                                                                                                                               |

| <b>van Lankveld et al., 2004</b>                                      |                                                                                                                                                                                                                                                                                                                                                                                                                                                                                                                                                                                 |
|-----------------------------------------------------------------------|---------------------------------------------------------------------------------------------------------------------------------------------------------------------------------------------------------------------------------------------------------------------------------------------------------------------------------------------------------------------------------------------------------------------------------------------------------------------------------------------------------------------------------------------------------------------------------|
| Participants characteristics (number, age, disease criteria, details) | Couples with a patient with RA (n=59)<br>≈ 65% female<br>≈ 50 years<br>≈ 7.2 years disease duration<br>Disease criteria – ACR criteria 1987                                                                                                                                                                                                                                                                                                                                                                                                                                     |
| Intervention(s)                                                       | Cognitive-behavioural oriented self-management treatment with both spouse                                                                                                                                                                                                                                                                                                                                                                                                                                                                                                       |
| Intervention(s) characteristics                                       | The program combines education with CBT. The goal is to restructure disease related cognitions and to teach effective (active) coping styles using rational emotive therapy (RET). Cognitions targeted are the most important stressors of the disease: pain, limitations, and dependence. Patients meet for 8 sessions of 1.5 hour. One session focused on information-giving. In 3 sessions patients are educated about the treatment of RA. The remaining 4 lessons focus on changing the patient's cognitions and behaviour by using RET.                                   |
| Professional that promoted the interventions                          | Rheumatologist, psychologist, nurse, nutritionist, physiotherapist, occupational therapist, and social worker                                                                                                                                                                                                                                                                                                                                                                                                                                                                   |
| Intervention(s) setting                                               | Sint Maartenskliniek- hospital                                                                                                                                                                                                                                                                                                                                                                                                                                                                                                                                                  |
| Control                                                               | Patients without spouse                                                                                                                                                                                                                                                                                                                                                                                                                                                                                                                                                         |
| Outcomes of interest (types and measuring instruments)                | DAS28_ESR<br>Physical functioning - Impact of Rheumatic Diseases on General Health and Lifestyle instrument (IRGL)<br>Psychological functioning – IRGL<br>Cognitive evaluation of disease stressors – pain with IRGL; Perceived limitations and dependence (Likert scales)<br>Patient's passive pain coping - Coping with Rheumatoid Stressors (CORS)<br>Marital satisfaction - Marital Satisfaction of the Maudsley Marital Questionnaire (MMQ)<br>Social support – IRGL<br>Spousal criticism - spouse reaction questionnaire<br>Communication improvement – developed a scale |
| Methods of analysis                                                   | General linear model for repeated measures                                                                                                                                                                                                                                                                                                                                                                                                                                                                                                                                      |
| Effect size                                                           | Not stated                                                                                                                                                                                                                                                                                                                                                                                                                                                                                                                                                                      |
| 95% Confidence inter.                                                 | Not stated                                                                                                                                                                                                                                                                                                                                                                                                                                                                                                                                                                      |
| P value                                                               | In both conditions, similar positive changes in disease activity, cognitions, coping, and physical and psychological functioning were observed. Patients reported a decrease in potential support. There were no differences between conditions. However, at the follow up assessment patients in the experimental condition reported more improvement of disease related communication with their spouse.                                                                                                                                                                      |
| Follow-up                                                             | 6 months                                                                                                                                                                                                                                                                                                                                                                                                                                                                                                                                                                        |
| Conclusions                                                           | No evidence was found for additional beneficial effects of spouse participation in the cognitive-behavioural oriented self-management group treatment.                                                                                                                                                                                                                                                                                                                                                                                                                          |



| <b>Zuidema et al 2019</b>                                             |                                                                                                                                                                                                                                                                                                                                                                                                                  |
|-----------------------------------------------------------------------|------------------------------------------------------------------------------------------------------------------------------------------------------------------------------------------------------------------------------------------------------------------------------------------------------------------------------------------------------------------------------------------------------------------|
| Participants characteristics (number, age, disease criteria, details) | RA patients (n=157)<br>≈ 66% female<br>≈ 62 years<br>≈ Disease duration (median control 17 years/median intervention 9 years)<br>Disease criteria – not stated                                                                                                                                                                                                                                                   |
| Intervention(s)                                                       | Web-Based Self-Management Enhancing Program                                                                                                                                                                                                                                                                                                                                                                      |
| Intervention(s) characteristics                                       | Program comprises 9 modules with 13 performance objectives and a diary to track patients' fatigue and pain over time. Each module comprises 2-5 sessions, with informational and persuasive texts, videos with instructions and role models, exercises, and assignments. The program is unguided, and patients need to choose a module by their own and can work through it at their own pace whenever they want |
| Professional that promoted the interventions                          | The program was promoted by nurses although is not clear the professionals that perform intervention                                                                                                                                                                                                                                                                                                             |
| Intervention(s) setting                                               | Specialized hospital in rheumatology, rehabilitation, and orthopaedic surgery                                                                                                                                                                                                                                                                                                                                    |
| Control                                                               | Usual care                                                                                                                                                                                                                                                                                                                                                                                                       |
| Outcomes of interest (types and measuring instruments)                | Self-management behaviour -Patient Activation Measurement (PAM-13); Self-Management Ability Scale (SMAS-S)<br>Self-efficacy - Self-Efficacy (RASE), Perceived Efficacy in Patient-Physician Interaction (PEPPI-5)<br>General health status - RAND-36<br>Coping with fatigue - Modified Pain Coping Inventory for Fatigue (MPCI-F)<br>Level of pain and fatigue - NRS                                             |
| Methods of analysis                                                   | Linear mixed model                                                                                                                                                                                                                                                                                                                                                                                               |
| Effect size                                                           | Effect sizes were low.                                                                                                                                                                                                                                                                                                                                                                                           |
| 95% Confidence inter.                                                 | Not stated                                                                                                                                                                                                                                                                                                                                                                                                       |
| P value                                                               | No positive effects were found regarding the outcome measurements                                                                                                                                                                                                                                                                                                                                                |
| Follow-up                                                             | 12 months                                                                                                                                                                                                                                                                                                                                                                                                        |
| Conclusions                                                           | It was not possible to conclude on the positive effects of the intervention or to select outcome measures to be regarded as the primary/main or secondary outcomes for a future trial. A process evaluation should be performed to provide more insight into the low compliance with and effectiveness of the intervention                                                                                       |
